# Supplementary material for: Design, Synthesis, and Bioactivity Evaluation of Novel Isoxazole-Amide Derivatives Containing an Acylhydrazone Moiety as New Active Antiviral Agents
Source: PubMed Central journal article supplement (PMC6832660; doi:10.3390/molecules24203766), 2019-10-19
Supplement: molecules-24-03766-s001.pdf [file molecules-24-03766-s001.pdf]

# Design, Synthesis and Bioactivity Evaluation of Novel Isoxazole-Amide Derivatives Containing an Acylhydrazone Moiety as New Active Antiviral Agents

Zai-Bo Yang <sup>1,\*,+</sup>, Pei Li <sup>1,2,\*,+</sup> and Yin-Ju He <sup>1</sup>

<sup>1</sup> School of Chemistry and Chemical Engineering, Qiannan Normal University for Nationalities, Duyun 558000, China; heyinju2007@163.com

<sup>2</sup> Qiandongnan Engineering and Technology Research Center for Comprehensive Utilization of National Medicine, Kaili University, Kaili 556011, China

\* Correspondence: yzb1976110@sohu.com (Z-B.Y.); pl19890627@126.com (P.L.); Tel.: +86(854)873-7046

+ These authors contributed equally to this work.

**Table S1.** The preliminary in vivo antiviral activities against TMV and CMV of the target compounds

7a–7v at 500 mg/L.

| Compound<br>s | TMV                   |                         |                           | CMV                   |                         |                           |
|---------------|-----------------------|-------------------------|---------------------------|-----------------------|-------------------------|---------------------------|
|               | Curative activity (%) | Protection activity (%) | Inactivation activity (%) | Curative activity (%) | Protection activity (%) | Inactivation activity (%) |
| 7a            | 48.5 ± 3.0            | 54.2 ± 3.1              | 85.6 ± 1.7                | 38.4 ± 1.2            | 47.6 ± 1.3              | 69.9 ± 1.5                |
| 7b            | 40.8 ± 2.1            | 46.5 ± 5.0              | 83.4 ± 2.1                | 33.6 ± 1.4            | 44.7 ± 1.8              | 65.8 ± 1.7                |
| 7c            | 39.4 ± 1.3            | 59.4 ± 2.2              | 87.7 ± 2.3                | 37.9 ± 1.9            | 54.6 ± 2.1              | 72.6 ± 2.4                |
| 7d            | 62.9 ± 1.2            | 67.2 ± 3.0              | 93.6 ± 3.3                | 56.7 ± 2.1            | 63.8 ± 2.5              | 91.4 ± 2.6                |
| 7e            | 28.2 ± 3.1            | 39.8 ± 2.1              | 55.1 ± 2.9                | 14.4 ± 1.3            | 24.6 ± 1.5              | 42.3 ± 1.2                |
| 7f            | 36.7 ± 1.4            | 50.2 ± 4.2              | 78.8 ± 1.6                | 33.5 ± 1.6            | 43.6 ± 2.3              | 76.9 ± 2.1                |
| 7g            | 35.6 ± 2.2            | 42.4 ± 1.7              | 74.7 ± 1.8                | 30.7 ± 1.8            | 40.5 ± 1.4              | 70.8 ± 1.9                |
| 7h            | 64.5 ± 1.2            | 69.6 ± 2.6              | 94.1 ± 1.2                | 58.8 ± 2.2            | 65.4 ± 2.5              | 92.0 ± 2.6                |
| 7i            | 50.4 ± 1.2            | 58.2 ± 2.3              | 86.4 ± 1.9                | 47.3 ± 1.6            | 54.7 ± 2.1              | 80.7 ± 1.8                |
| 7j            | 55.4 ± 1.3            | 65.3 ± 1.1              | 92.6 ± 3.2                | 51.6 ± 1.7            | 57.5 ± 1.6              | 81.8 ± 2.7                |
| 7k            | 47.5 ± 1.1            | 56.4 ± 2.3              | 85.5 ± 3.7                | 48.3 ± 1.5            | 54.8 ± 2.2              | 78.4 ± 2.6                |
| 7l            | 43.9 ± 4.2            | 60.4 ± 4.1              | 89.4 ± 3.3                | 41.6 ± 1.8            | 56.2 ± 2.4              | 75.8 ± 2.3                |
| 7m            | 65.1 ± 2.2            | 69.7 ± 1.0              | 95.3 ± 2.6                | 58.6 ± 2.5            | 64.4 ± 1.7              | 92.8 ± 2.8                |
| 7n            | 36.5 ± 1.0            | 43.6 ± 1.2              | 67.5 ± 1.8                | 26.5 ± 1.1            | 34.8 ± 1.4              | 52.9 ± 1.3                |
| 7o            | 42.2 ± 4.5            | 56.3 ± 1.5              | 84.2 ± 2.1                | 39.6 ± 2.2            | 49.7 ± 1.6              | 75.8 ± 2.5                |
| 7p            | 40.9 ± 4.1            | 49.4 ± 1.0              | 78.2 ± 1.4                | 36.2 ± 2.0            | 44.8 ± 1.4              | 69.9 ± 1.8                |
| 7q            | 67.0 ± 2.3            | 72.7 ± 2.2              | 96.3 ± 1.5                | 60.8 ± 2.7            | 67.8 ± 2.9              | 93.8 ± 1.9                |
| 7r            | 56.7 ± 2.1            | 64.3 ± 2.3              | 93.3 ± 3.1                | 57.9 ± 2.5            | 63.6 ± 2.4              | 91.9 ± 2.8                |
| 7s            | 52.3 ± 1.6            | 60.3 ± 4.1              | 89.1 ± 1.3                | 47.7 ± 1.8            | 52.2 ± 2.3              | 80.6 ± 1.5                |
| 7t            | 68.8 ± 2.5            | 74.8 ± 2.6              | 96.9 ± 2.9                | 65.9 ± 2.8            | 70.2 ± 2.5              | 94.6 ± 2.4                |
| 7u            | 40.5 ± 2.2            | 57.4 ± 2.0              | 76.9 ± 1.2                | 36.2 ± 2.1            | 48.9 ± 2.2              | 68.7 ± 2.3                |
| 7v            | 37.2 ± 3.1            | 42.5 ± 3.0              | 67.7 ± 2.8                | 31.4 ± 1.2            | 38.6 ± 1.4              | 62.0 ± 2.5                |
| NNM           | 55.6 ± 1.6            | 63.8 ± 2.9              | 92.5 ± 1.3                | 54.7 ± 3.4            | 62.6 ± 2.5              | 91.0 ± 3.0                |

**Table S2.** The EC<sub>50</sub> values of the target compounds 7a–7v against TMV in vivo.

| Compounds | EC <sub>50</sub> (mg/L) |                     |                       |
|-----------|-------------------------|---------------------|-----------------------|
|           | Curative activity       | Protection activity | Inactivation activity |
| 7a        | 358.5 ± 3.4             | 256.5 ± 3.4         | 97.8 ± 1.6            |
| 7b        | 395.8 ± 3.1             | 324.7 ± 3.2         | 132.8 ± 1.9           |
| 7c        | 356.8 ± 3.2             | 288.6 ± 2.8         | 105.6 ± 1.8           |
| 7d        | 238.9 ± 1.9             | 187.2 ± 2.4         | 46.7 ± 1.2            |
| 7e        | 536.3 ± 3.7             | 429.8 ± 2.9         | 245.1 ± 2.3           |
| 7f        | 370.7 ± 3.5             | 290.7 ± 3.8         | 148.9 ± 2.6           |
| 7g        | 395.6 ± 3.2             | 322.6 ± 2.2         | 171.5 ± 2.1           |
| 7h        | 195.5 ± 2.3             | 172.6 ± 2.8         | 43.1 ± 1.5            |
| 7i        | 516.7 ± 3.2             | 345.2 ± 2.6         | 86.4 ± 1.2            |
| 7j        | 291.4 ± 3.1             | 232.3 ± 2.6         | 52.9 ± 1.5            |
| 7k        | 364.5 ± 3.5             | 276.8 ± 2.9         | 118.7 ± 1.7           |
| 7l        | 336.8 ± 4.7             | 249.4 ± 4.5         | 95.8 ± 1.6            |
| 7m        | 189.9 ± 2.5             | 176.5 ± 2.5         | 44.5 ± 1.5            |
| 7n        | 487.6 ± 4.8             | 361.7 ± 2.7         | 228.5 ± 2.3           |
| 7o        | 368.6 ± 4.3             | 280.3 ± 3.3         | 123.7 ± 2.6           |
| 7p        | 385.6 ± 4.1             | 299.8 ± 3.2         | 146.8 ± 2.5           |
| 7q        | 179.6 ± 3.5             | 169.2 ± 2.9         | 36.9 ± 1.8            |
| 7r        | 266.8 ± 2.9             | 199.4 ± 3.5         | 42.7 ± 1.6            |
| 7s        | 332.3 ± 3.2             | 296.5 ± 3.5         | 80.6 ± 1.4            |
| 7t        | 168.5 ± 1.9             | 157.6 ± 2.1         | 33.7 ± 1.7            |

|            |             |             |             |
|------------|-------------|-------------|-------------|
| <b>7u</b>  | 417.8 ± 2.8 | 377.1 ± 2.3 | 172.4 ± 3.6 |
| <b>7v</b>  | 448.9 ± 3.7 | 421.6 ± 3.5 | 197.7 ± 3.8 |
| <b>NNM</b> | 286.4 ± 2.2 | 198.2 ± 2.1 | 46.3 ± 1.9  |

**Table S3.** The EC<sub>50</sub> values of the target compounds **7a–7v** against CMV in vivo.

| <b>Compounds</b> | <b>EC<sub>50</sub> (mg/L)</b> |                            |                              |
|------------------|-------------------------------|----------------------------|------------------------------|
|                  | <b>Curative activity</b>      | <b>Protection activity</b> | <b>Inactivation activity</b> |
| <b>7a</b>        | 365.2 ± 3.6                   | 338.6 ± 3.2                | 114.5 ± 1.9                  |
| <b>7b</b>        | 378.2 ± 3.8                   | 357.7 ± 3.5                | 138.2 ± 2.3                  |
| <b>7c</b>        | 387.6 ± 3.6                   | 347.4 ± 2.8                | 147.8 ± 2.3                  |
| <b>7d</b>        | 276.5 ± 2.4                   | 247.8 ± 2.9                | 57.3 ± 1.9                   |
| <b>7e</b>        | 547.6 ± 3.5                   | 528.2 ± 2.6                | 318.6 ± 2.9                  |
| <b>7f</b>        | 412.6 ± 3.8                   | 389.3 ± 3.6                | 193.6 ± 2.9                  |
| <b>7g</b>        | 428.9 ± 3.8                   | 406.4 ± 2.9                | 223.5 ± 3.2                  |
| <b>7h</b>        | 226.4 ± 3.5                   | 215.8 ± 2.5                | 53.7 ± 1.8                   |
| <b>7i</b>        | 361.2 ± 3.5                   | 328.7 ± 2.9                | 108.7 ± 1.3                  |
| <b>7j</b>        | 338.7 ± 3.4                   | 288.9 ± 3.5                | 93.8 ± 1.8                   |
| <b>7k</b>        | 355.5 ± 3.9                   | 319.6 ± 2.5                | 105.4 ± 1.9                  |
| <b>7l</b>        | 358.8 ± 4.2                   | 331.5 ± 3.6                | 129.6 ± 1.8                  |
| <b>7m</b>        | 248.5 ± 3.6                   | 198.3 ± 3.2                | 51.8 ± 1.4                   |
| <b>7n</b>        | 519.9 ± 4.7                   | 488.3 ± 4.5                | 287.8 ± 2.9                  |
| <b>7o</b>        | 395.4 ± 3.7                   | 379.8 ± 3.4                | 169.2 ± 2.9                  |
| <b>7p</b>        | 407.4 ± 4.2                   | 389.4 ± 3.6                | 192.3 ± 2.8                  |
| <b>7q</b>        | 227.3 ± 3.2                   | 179.7 ± 2.5                | 47.6 ± 1.9                   |
| <b>7r</b>        | 268.5 ± 2.6                   | 236.9 ± 3.2                | 56.4 ± 1.4                   |
| <b>7s</b>        | 353.7 ± 3.5                   | 342.7 ± 3.6                | 89.4 ± 1.3                   |
| <b>7t</b>        | 197.9 ± 2.8                   | 168.4 ± 2.8                | 45.8 ± 1.2                   |
| <b>7u</b>        | 438.9 ± 3.6                   | 422.8 ± 2.9                | 226.8 ± 3.9                  |
| <b>7v</b>        | 456.7 ± 3.9                   | 438.9 ± 3.9                | 234.6 ± 3.6                  |
| <b>NNM</b>       | 297.3 ± 1.4                   | 263.4 ± 2.5                | 62.8 ± 1.8                   |

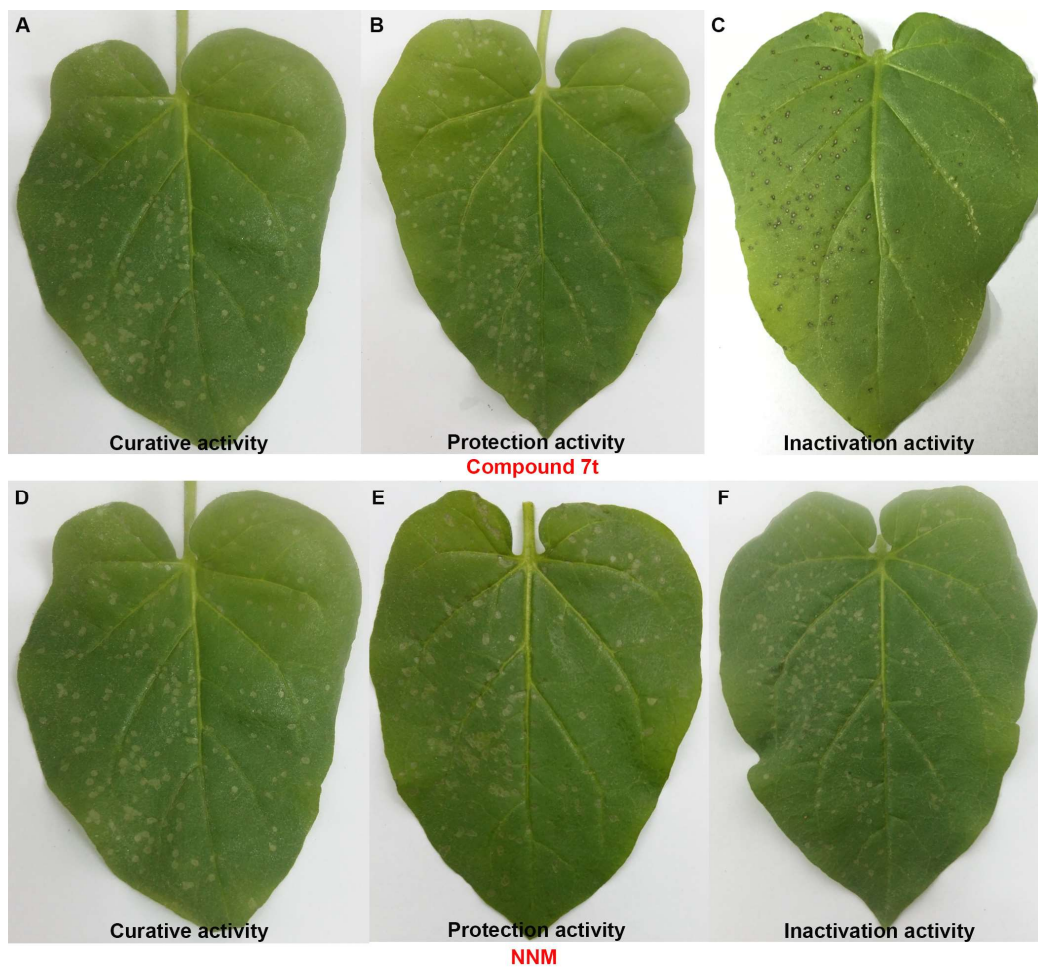

**Figure S1.** The antiviral activity of compound **7t** against TMV at 500 mg/L. Left: smeared with solvent; Right: smeared with compound **7t** or NNM.

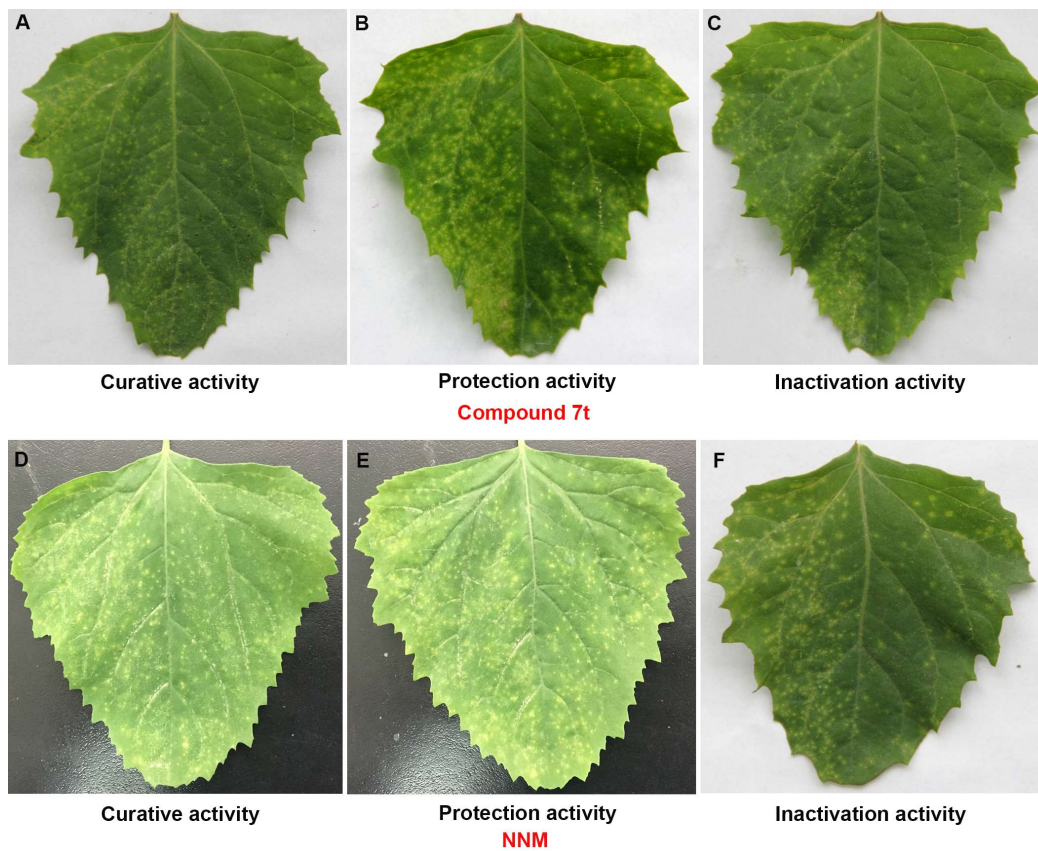

**Figure S2.** The antiviral activity of compound 7t against CMV at 500 mg/L. Left: smeared with solvent; Right: smeared with compound 7t or NNM.

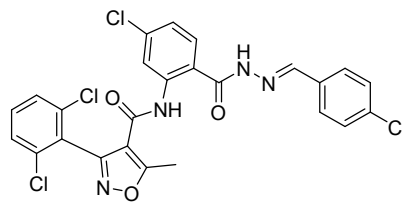

7a

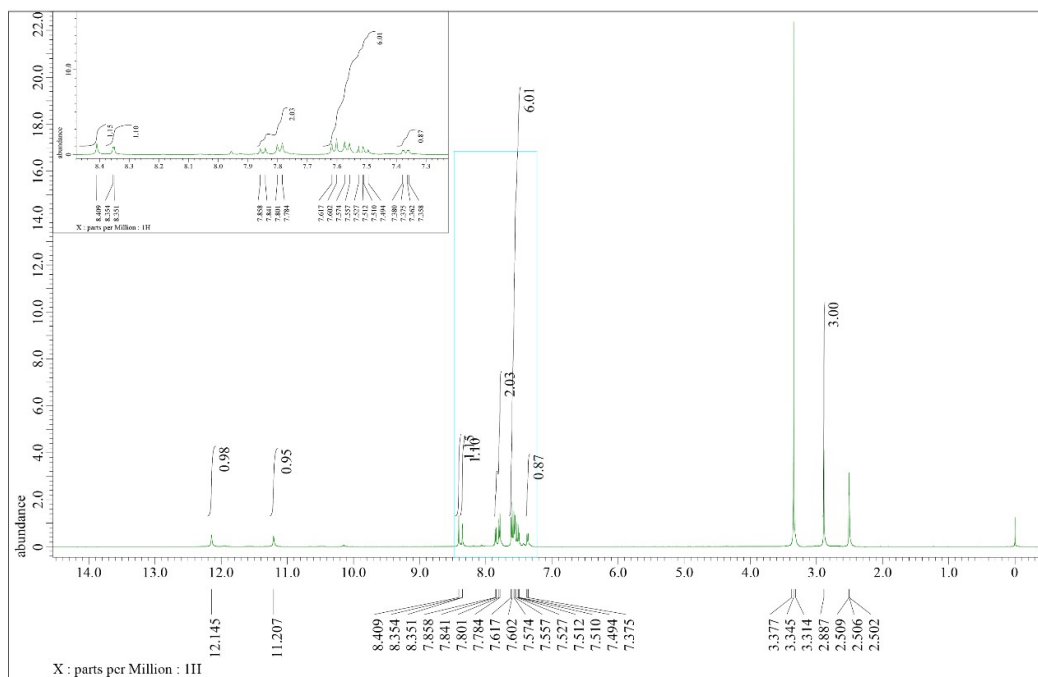

<sup>1</sup>H NMR of Compound 7a

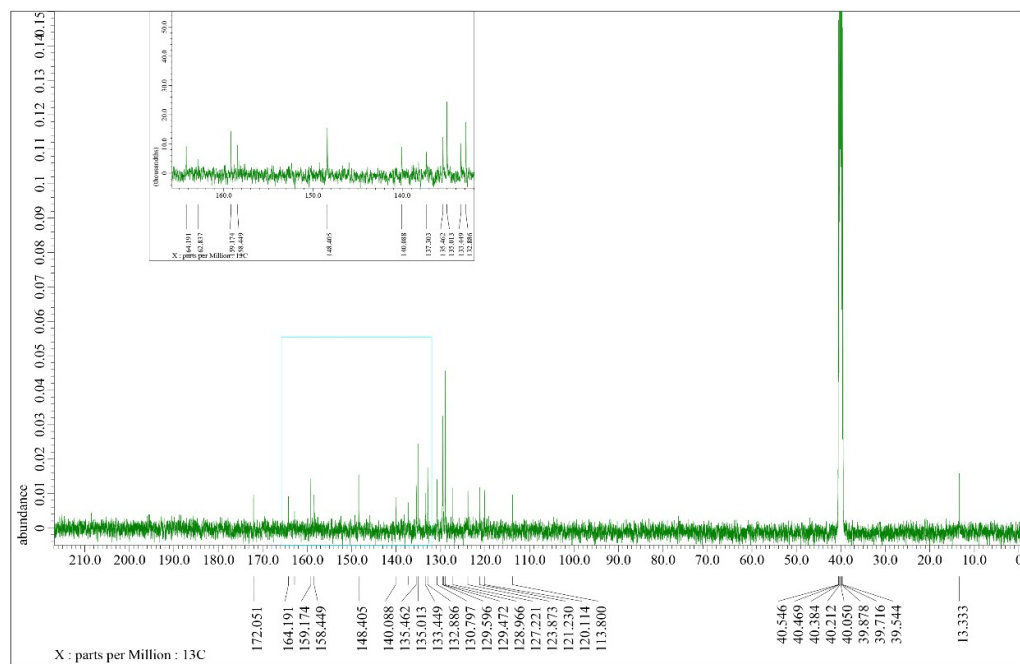

<sup>13</sup>C NMR of Compound 7a

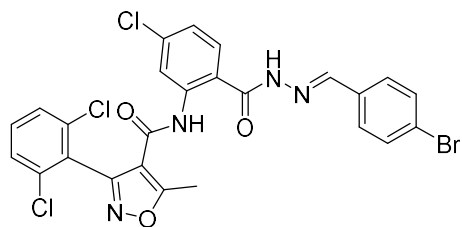

4b

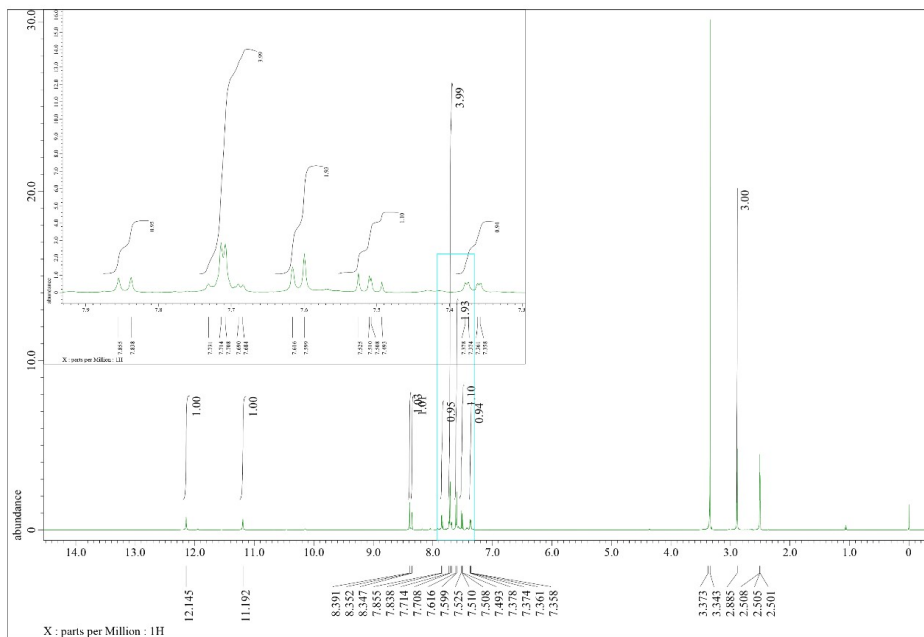

<sup>1</sup>H NMR of Compound 7b

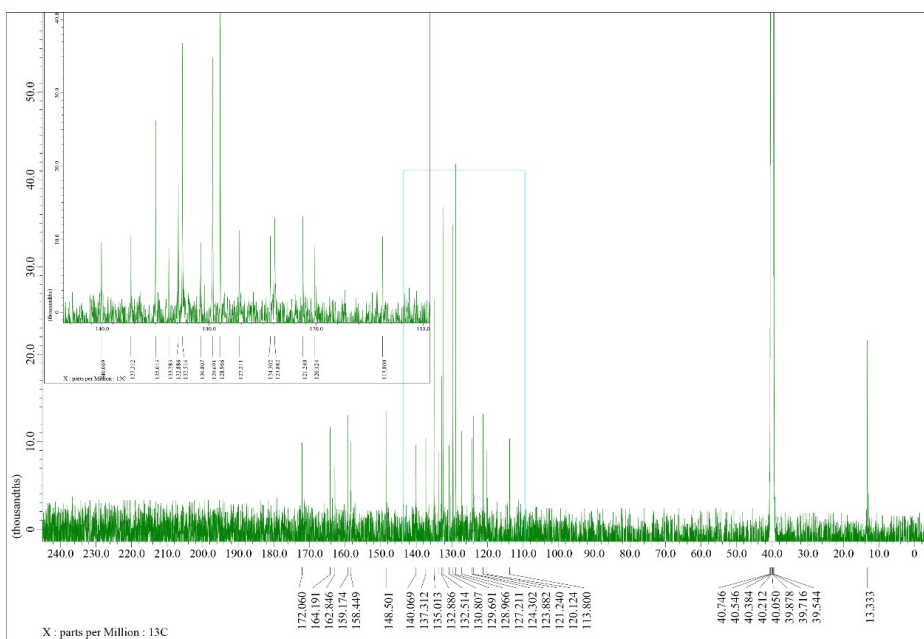

<sup>13</sup>C NMR of Compound 7b

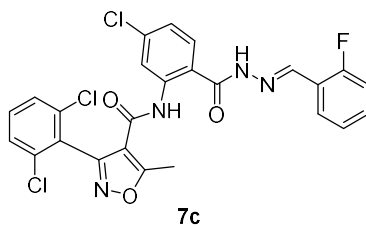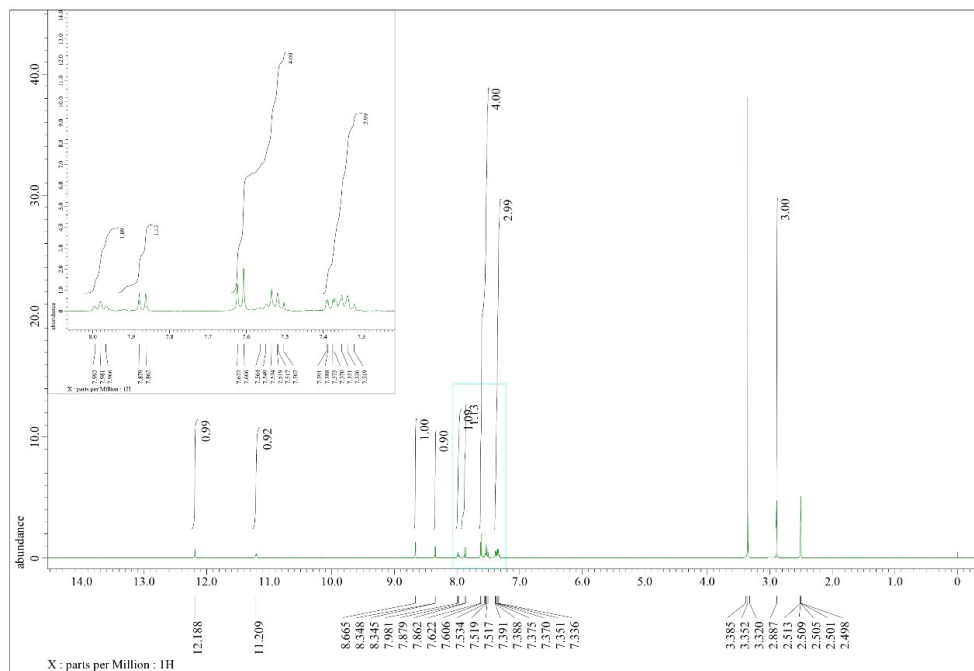

<sup>1</sup>H NMR of Compound 7c

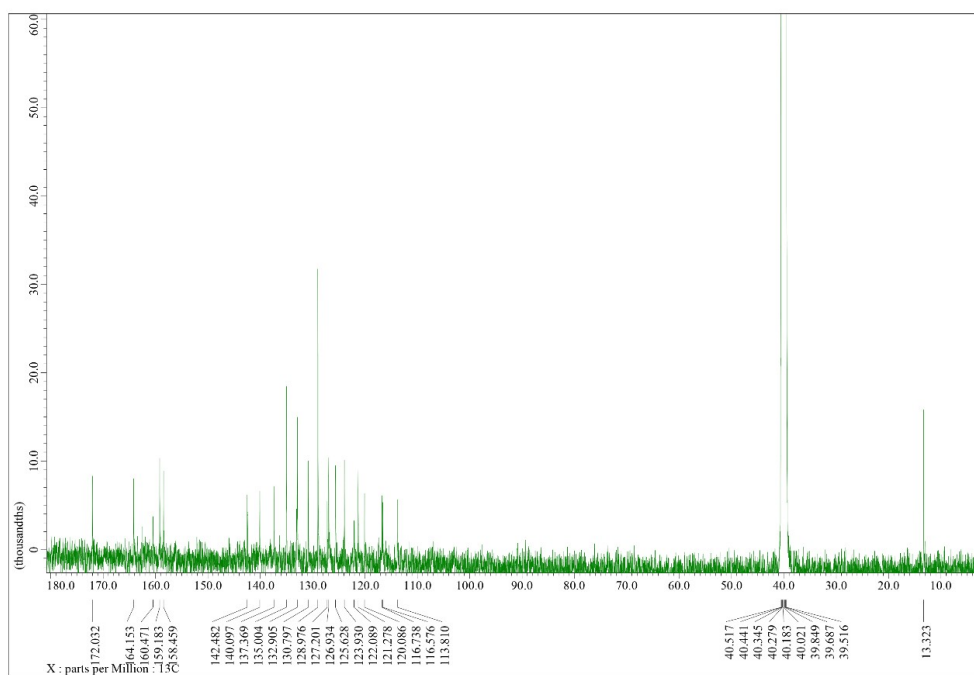

<sup>13</sup>C NMR of Compound 7c



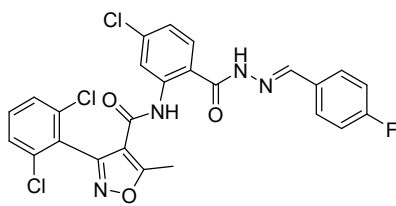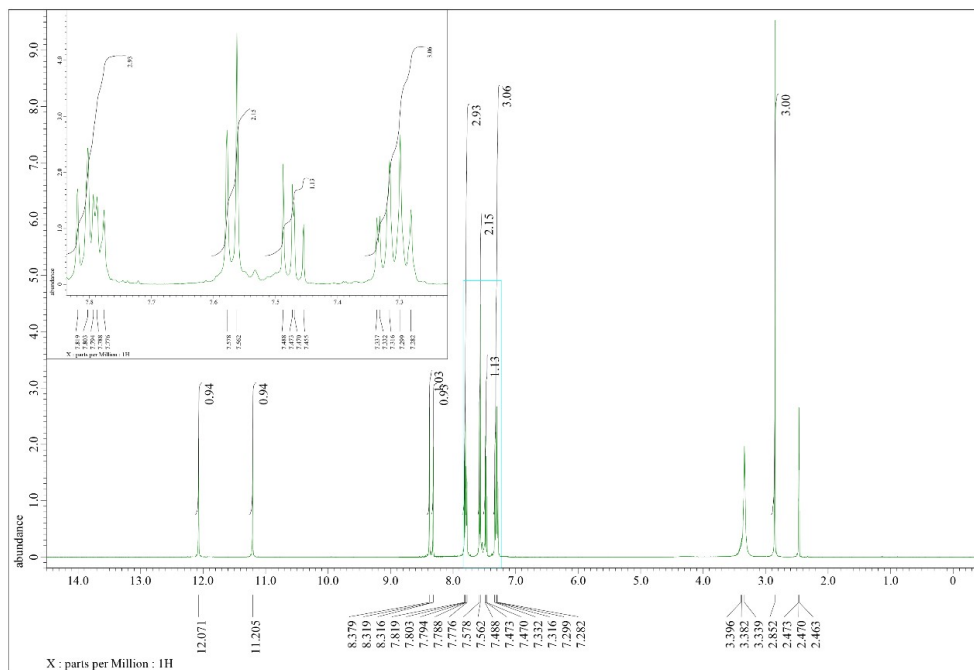

<sup>1</sup>H NMR of Compound 7d

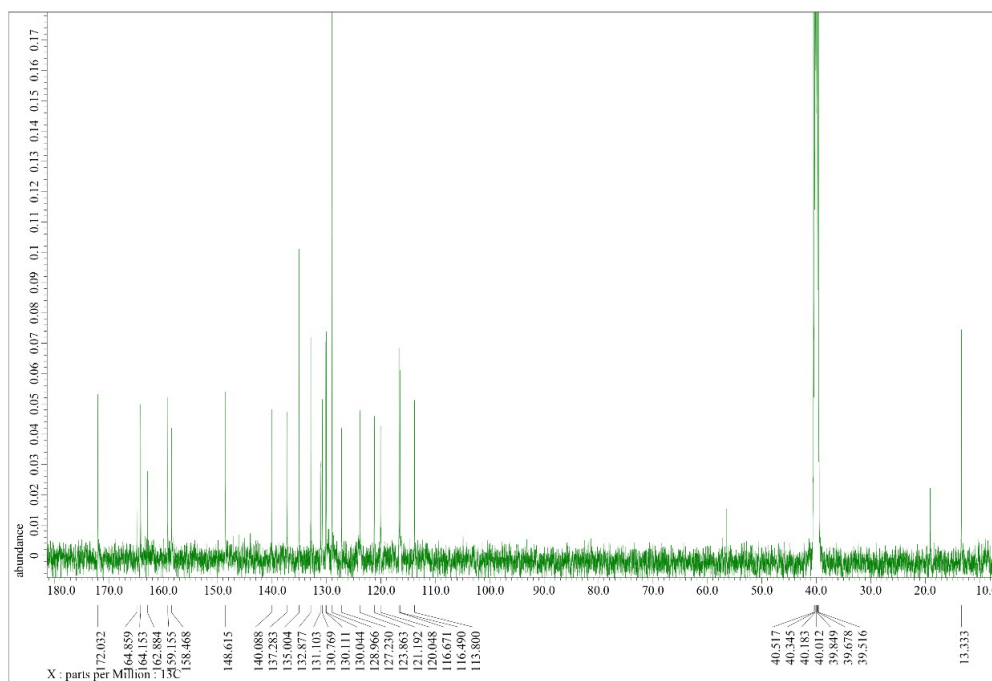

<sup>13</sup>C NMR of Compound 7d

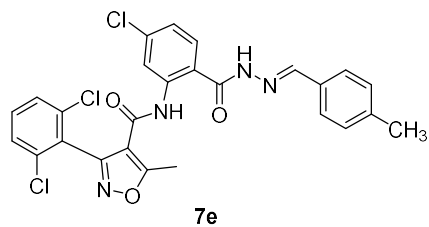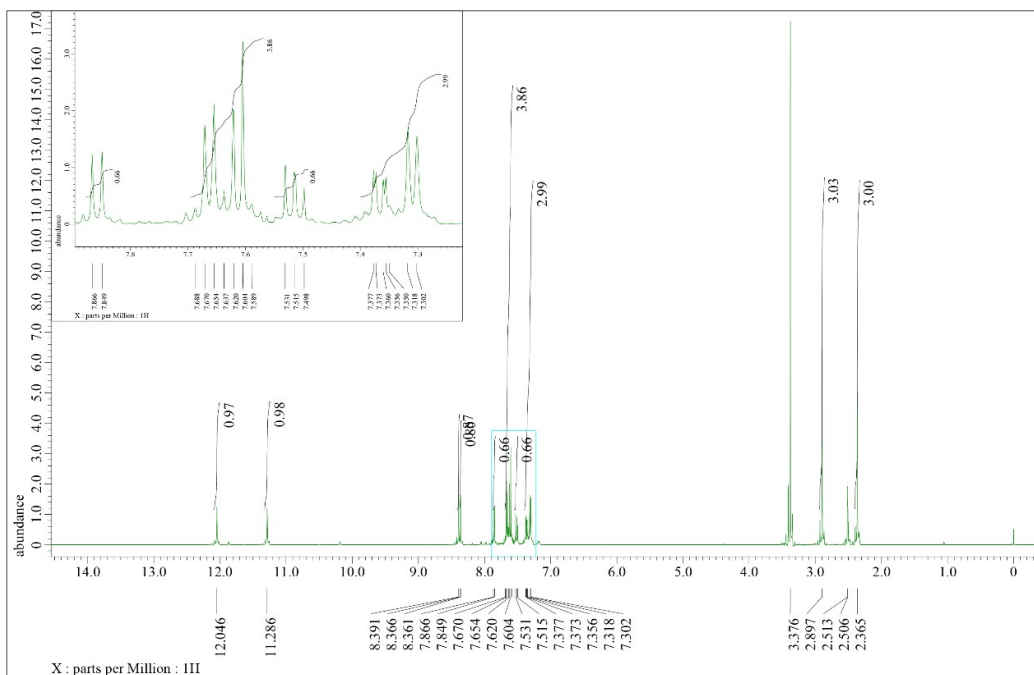

<sup>1</sup>H NMR of Compound 7e

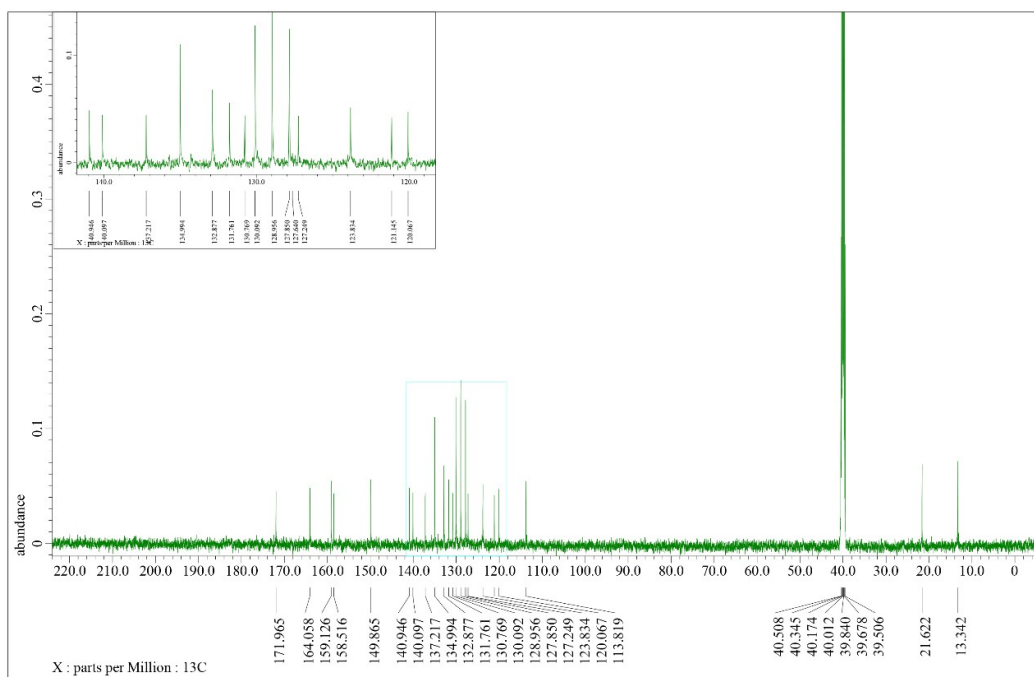

<sup>13</sup>C NMR of Compound 7e

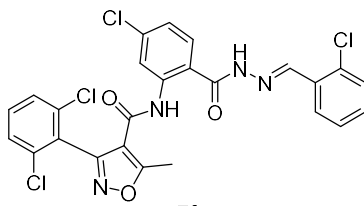

7f

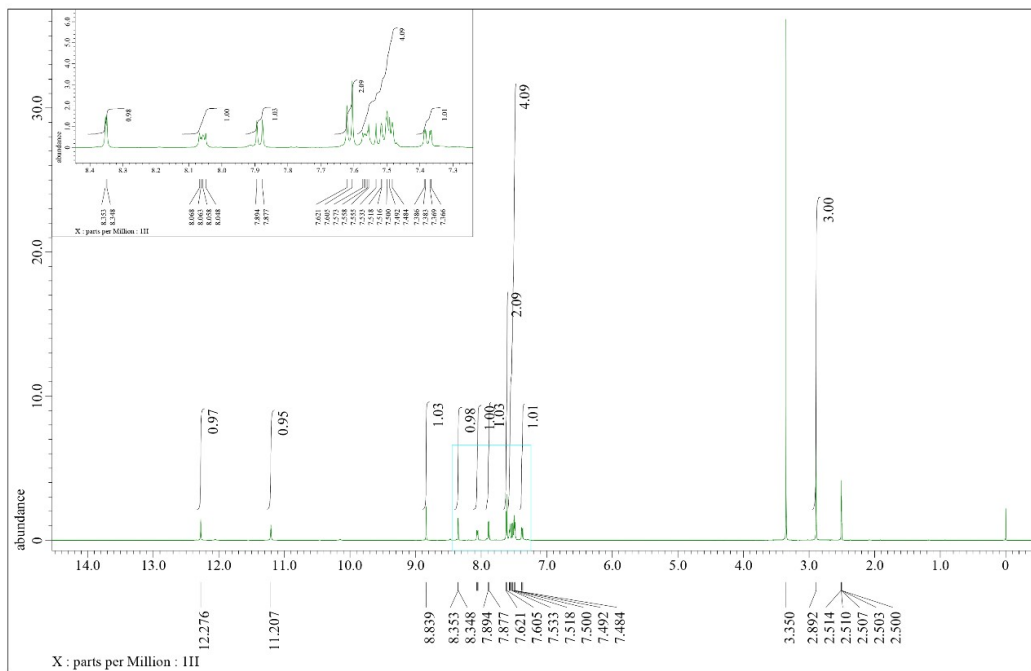

<sup>1</sup>H NMR of Compound 7f

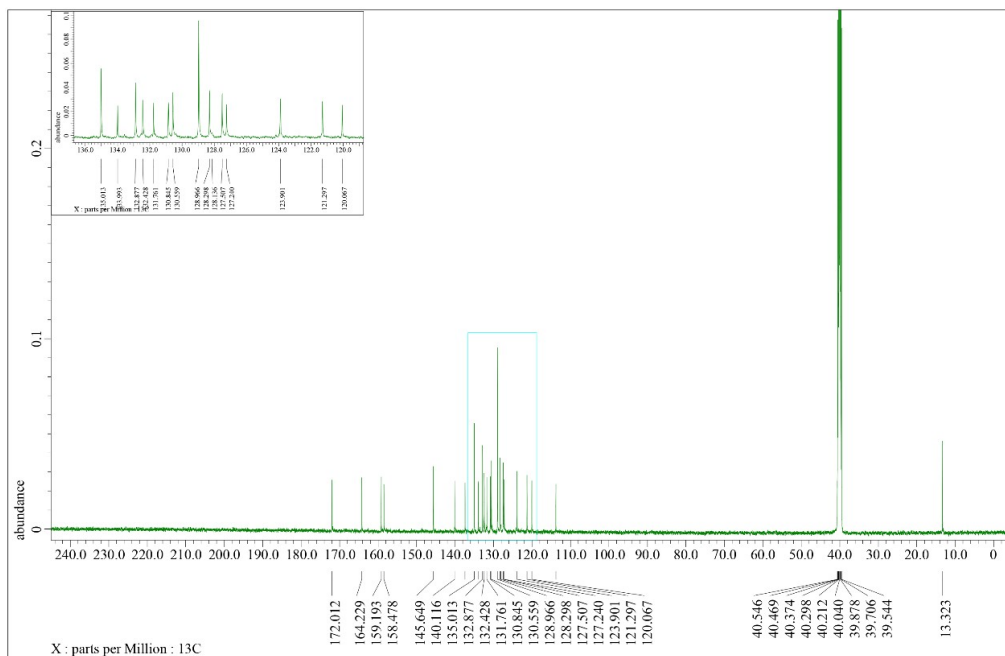

<sup>13</sup>C NMR of Compound 7f

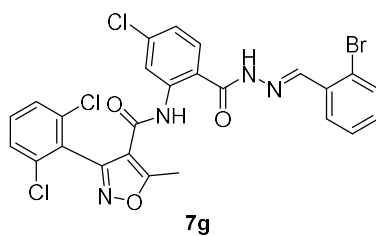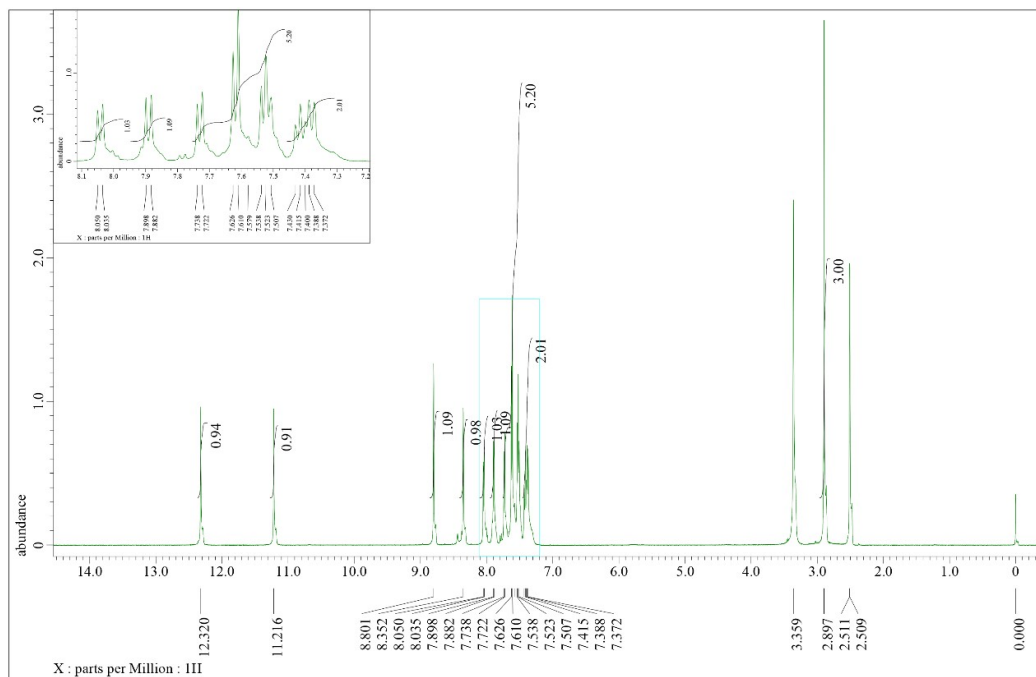

<sup>1</sup>H NMR of Compound 7g

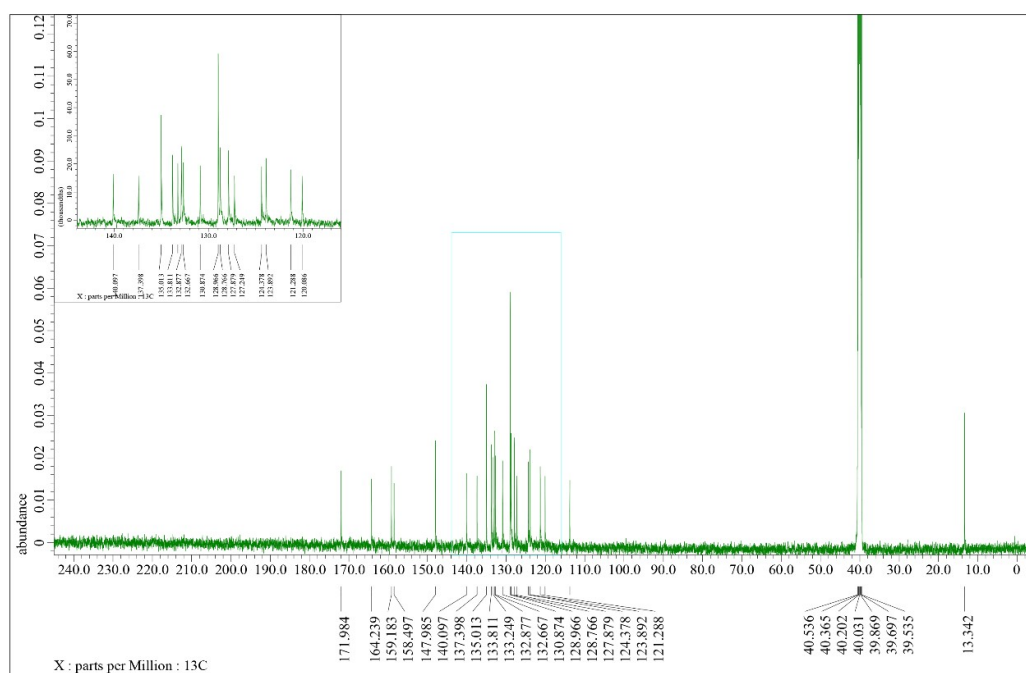

<sup>13</sup>C NMR of Compound 7g

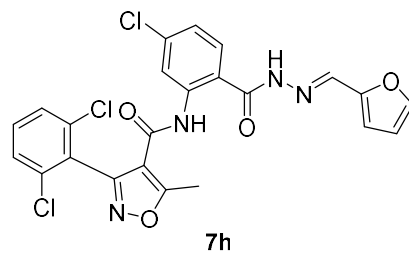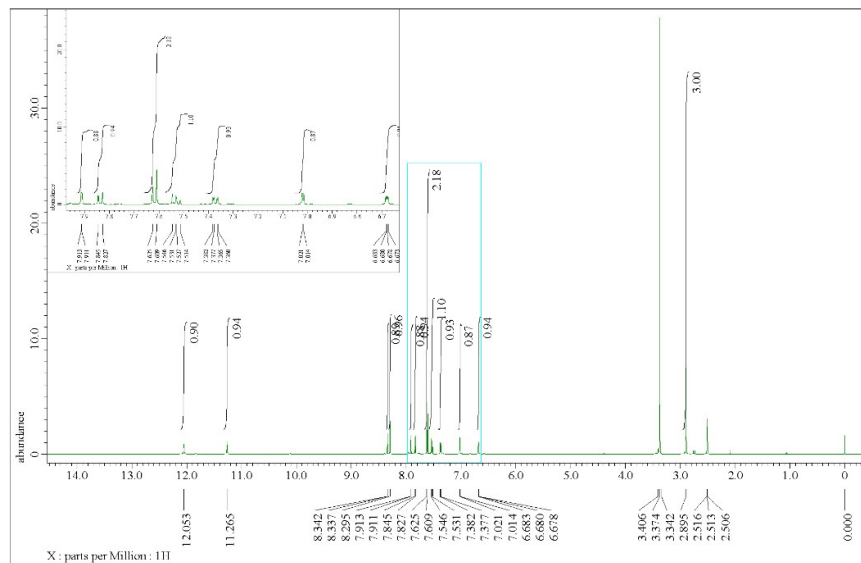

<sup>1</sup>H NMR of Compound 7h

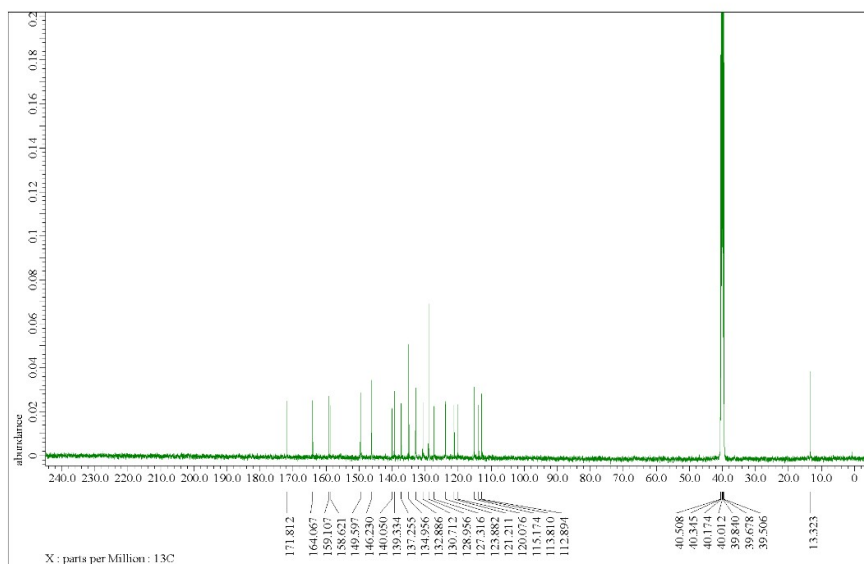

<sup>13</sup>C NMR of Compound 7h

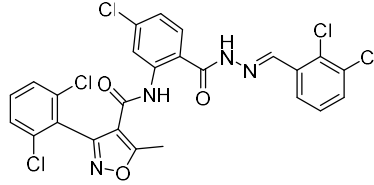

7i

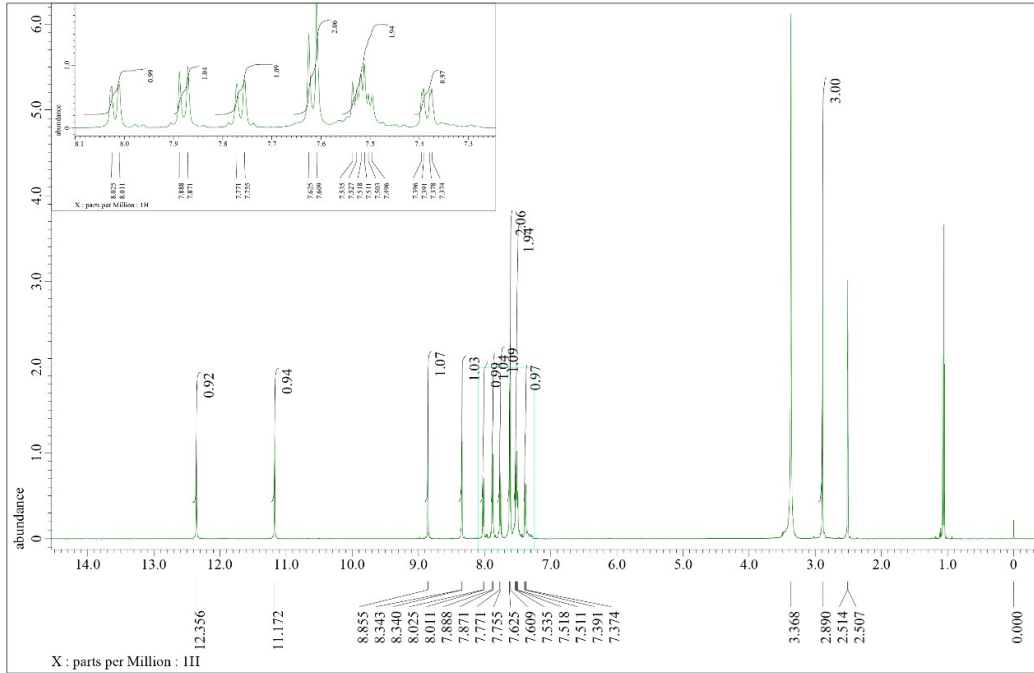

<sup>1</sup>H NMR of Compound 7i

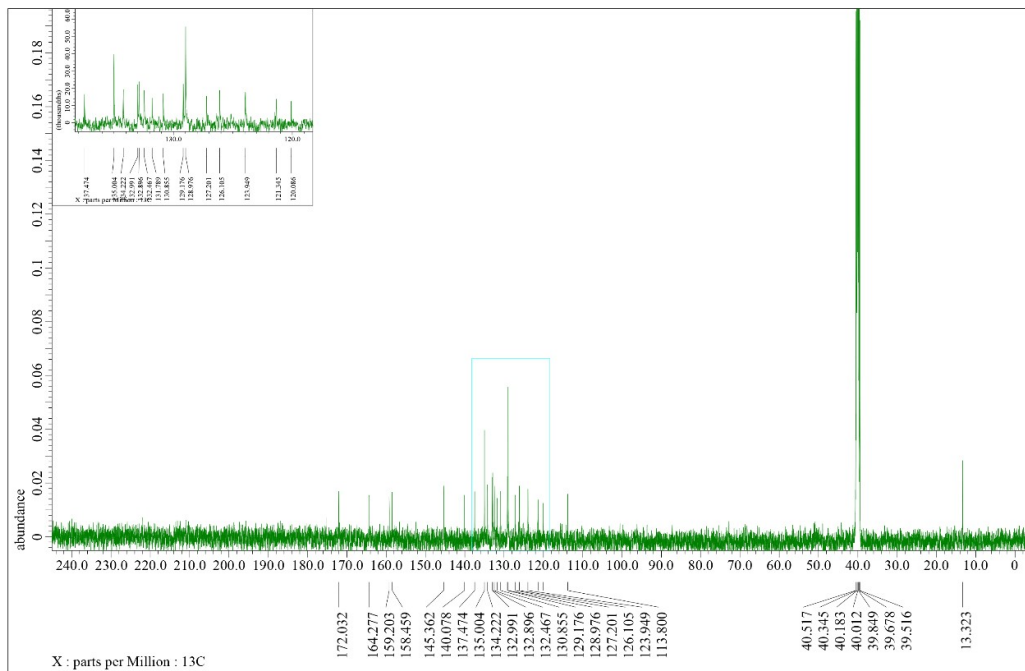

<sup>13</sup>C NMR of Compound 7i

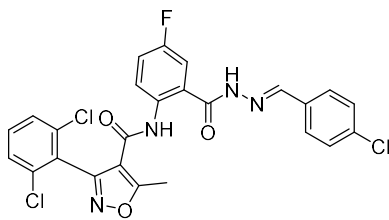

7j

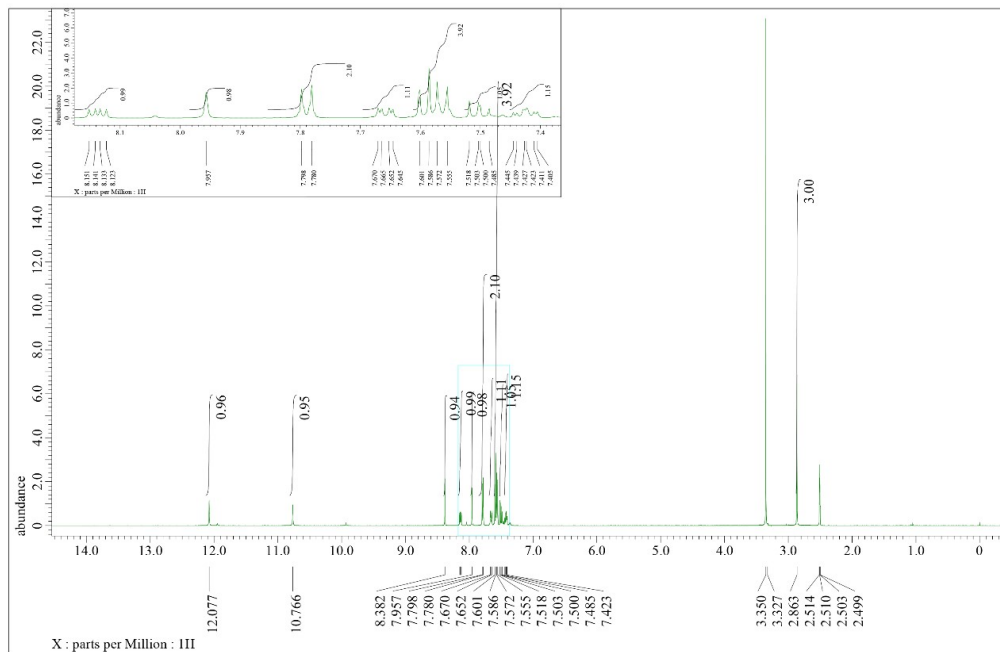

<sup>1</sup>H NMR of Compound 7j

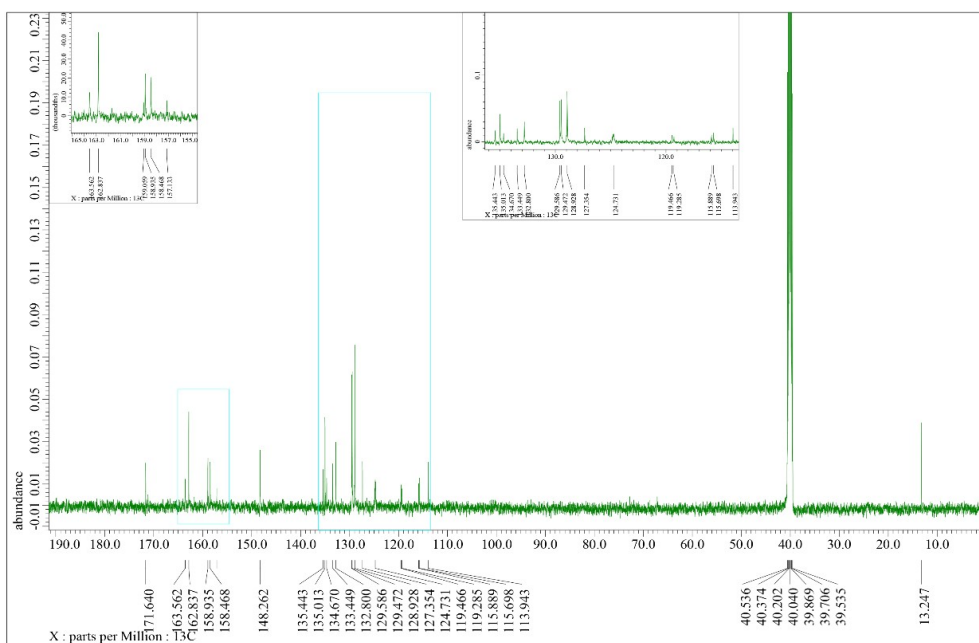

<sup>13</sup>C NMR of Compound 7j

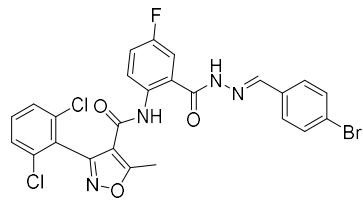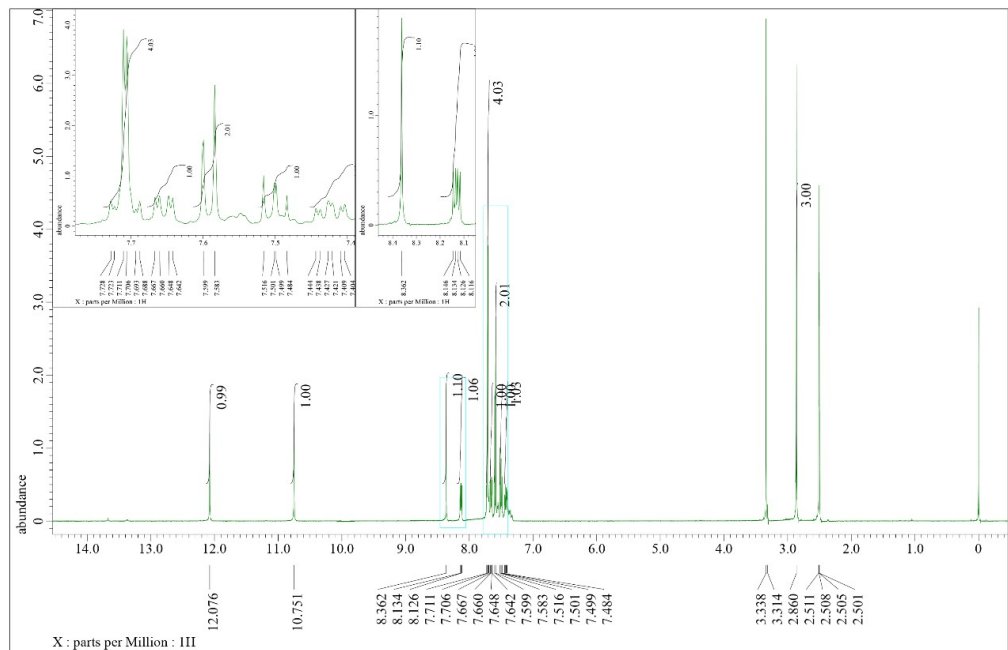

**<sup>1</sup>H NMR of Compound 7k**

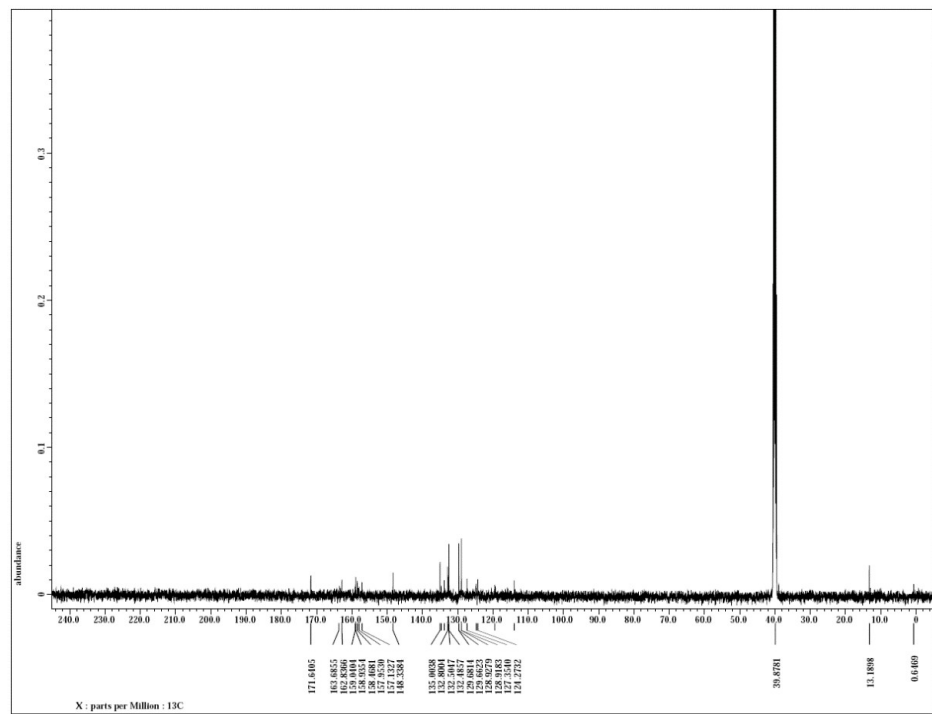

**<sup>13</sup>C NMR of Compound 7k**



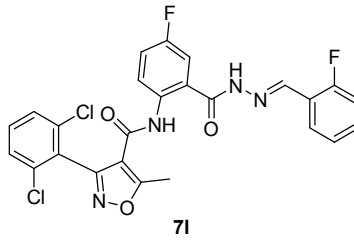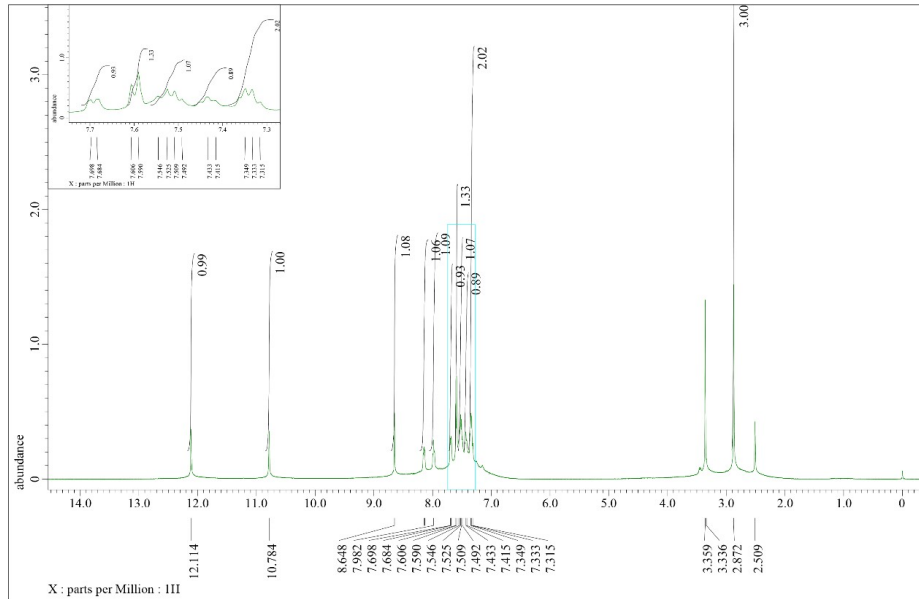

<sup>1</sup>H NMR of Compound 71

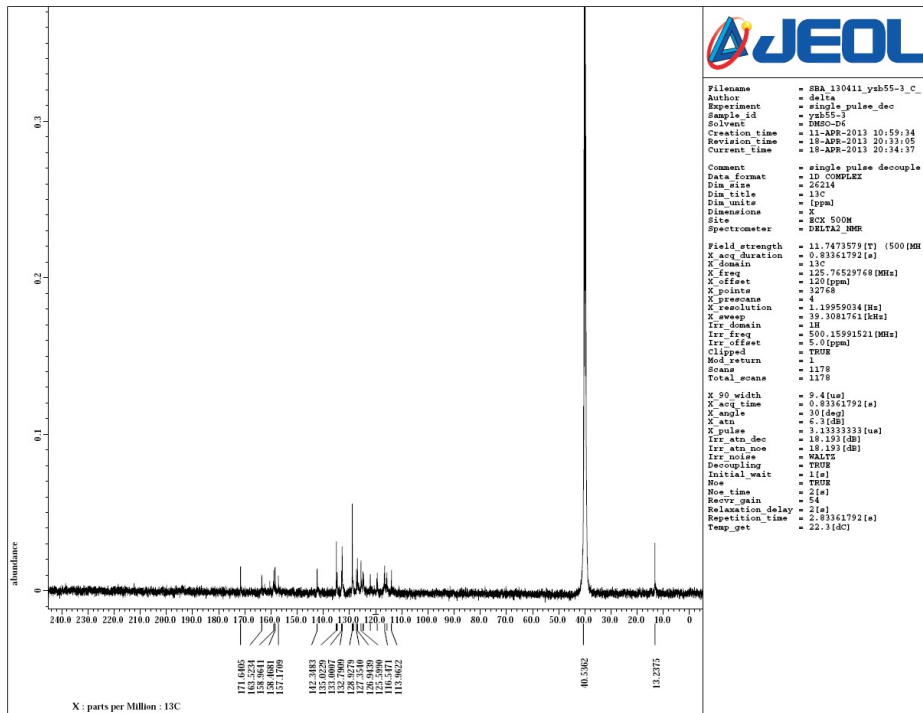

<sup>13</sup>C NMR of Compound 71

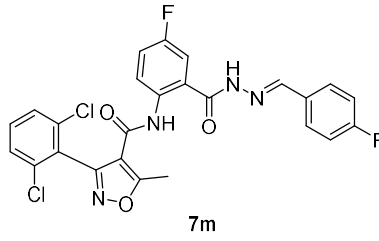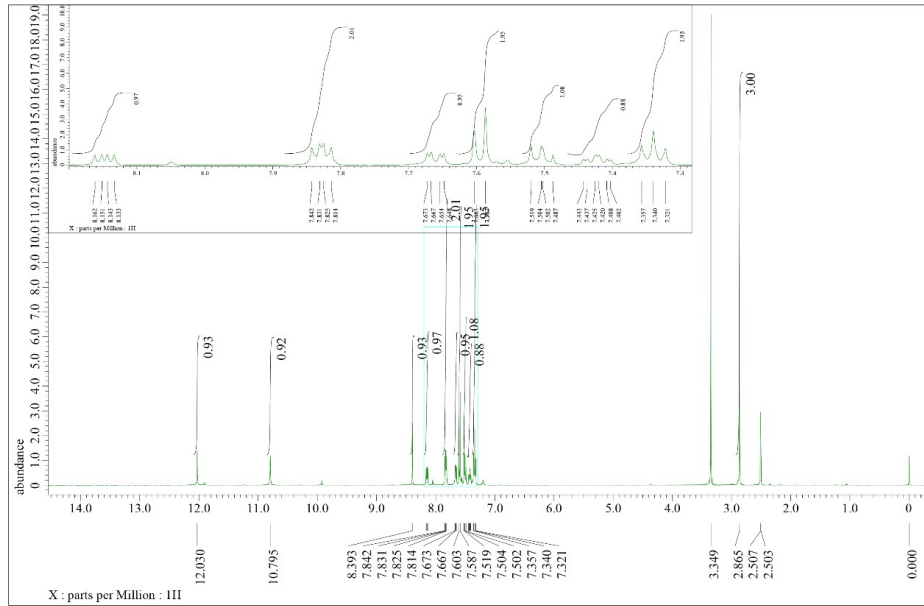

<sup>1</sup>H NMR of Compound 7m

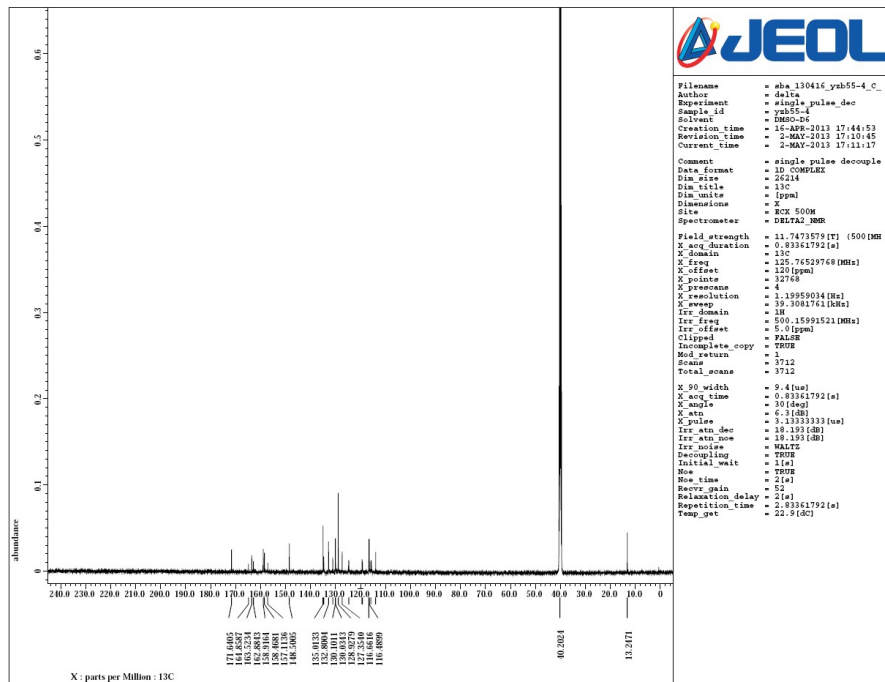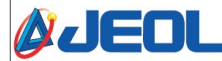

```

Filename = abc_13041c_yab55-4_c_
Author = delta
Experiment = single_pulse_dec
Sample_id = yab55-4
Solvent = DMSO-d6
Creation_time = 16-APR-2013 17:44:53
Revision_time = 2-MAY-2013 17:10:46
Current_time = 2-MAY-2013 17:11:17

Comment = single pulse decouple
Data_format = 1D_COMPLEX
Dim_size = 6214
Dim_title = 13c
Dim_units = [ppm]
Dimensions = 2
Site = FCC 500M
Spectrometer = DELTA2_NMR

Field_strength = 11.747379 [T] (500 MHz)
X_acq_duration = 0.83361792 [s]
X_domain = 13c
X_freq = 125.76529768 [MHz]
X_offset = 120 [ppm]
X_pulses = 12748
X_pulseprog = 4
X_resolution = 1.19550034 [Hz]
X_sweep = 19.3081762 [kHz]
Xr_domain = 18
Xr_freq = 500.15991521 [MHz]
Xr_offset = 6.0 [ppm]
Xr_pulse = 1
Incomplete_copy = TRUE
Mod_return = 1
Scans = 3712
Total_scans = 3712

X_90_width = 9.4 [us]
X_acq_time = 0.83361792 [s]
X_echo = 30 [us]
X_atn = 6.3 [dB]
X_pulse = 3.13333333 [us]
Xr_atn_dec = 18.193 [dB]
Xr_atn_inc = 18.193 [dB]
Xr_noise = WALTZ
Decoupling = DPMO
Initial_wait = 1 [s]
Max = 2 [s]
Recvr_gain = 52
Relaxation_delay = 2 [s]
Repetition_time = 2.93361792 [s]
Temp_pt = 21.9 [deg]
  
```

<sup>13</sup>C NMR of Compound 7m

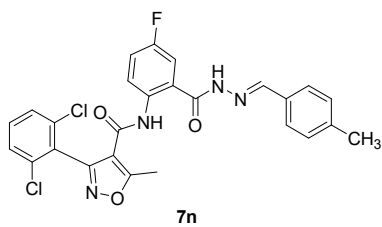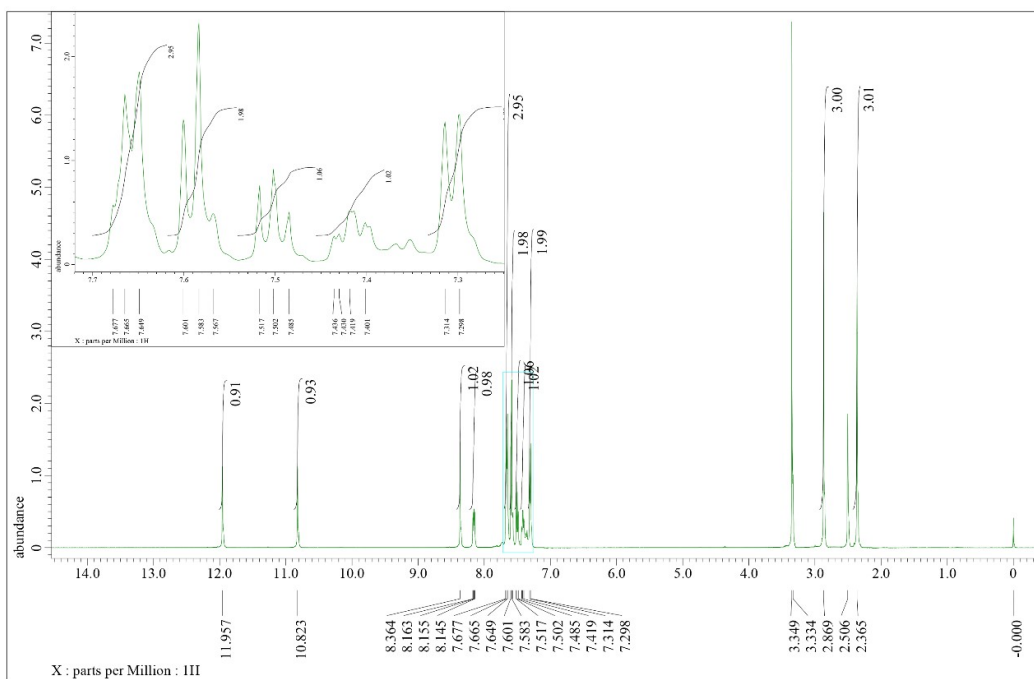

**<sup>1</sup>H NMR of Compound 7n**

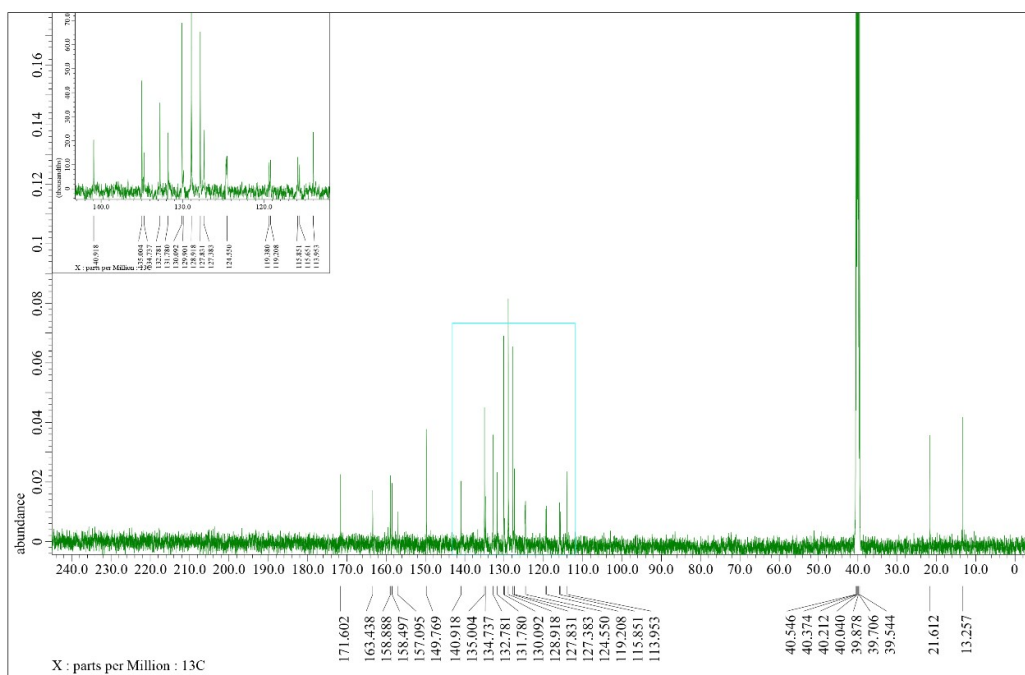

**<sup>13</sup>C NMR of Compound 7n**

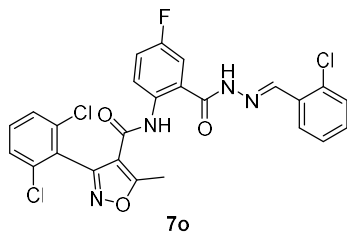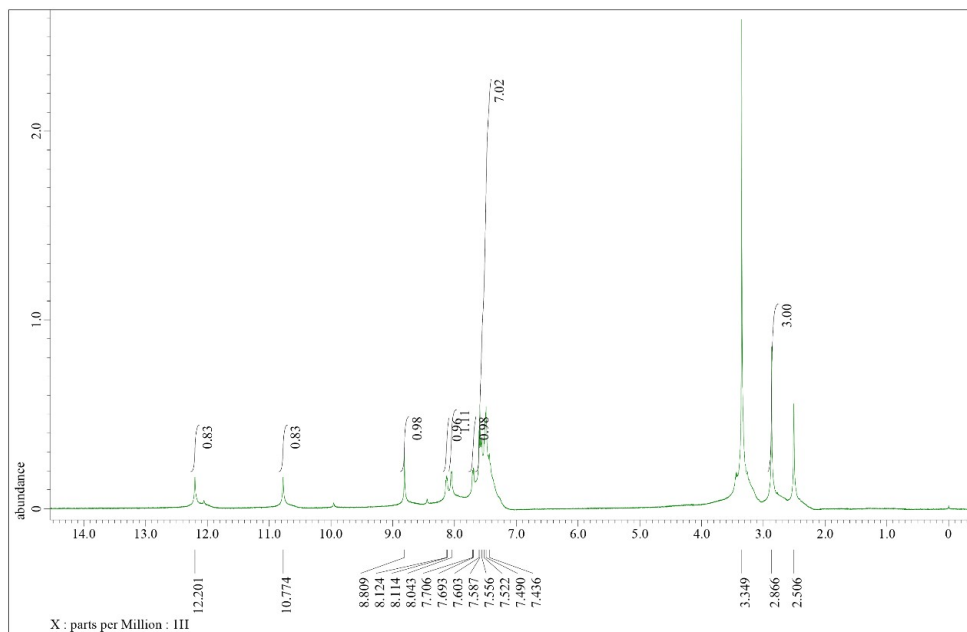

<sup>1</sup>H NMR of Compound 7o

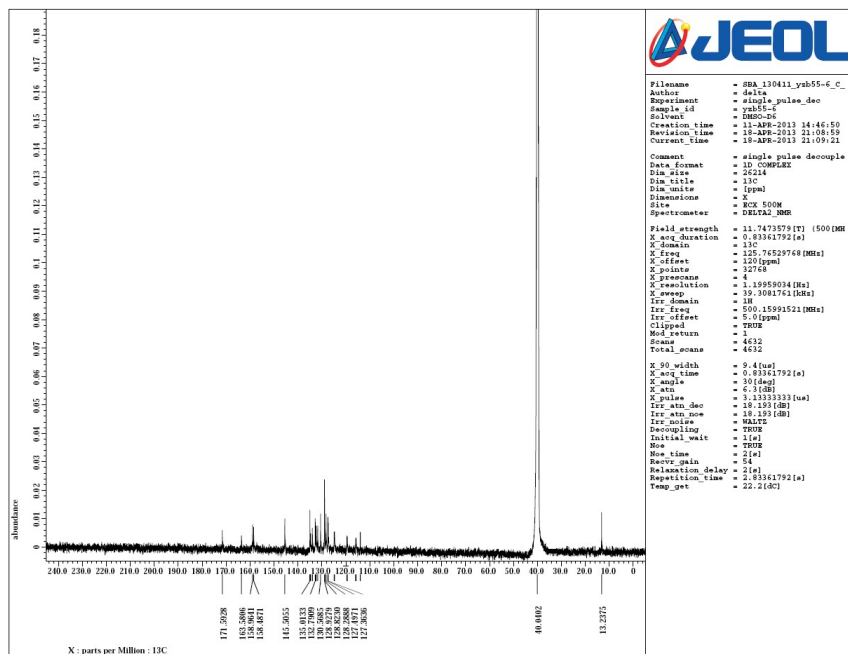

<sup>13</sup>C NMR of Compound 7o

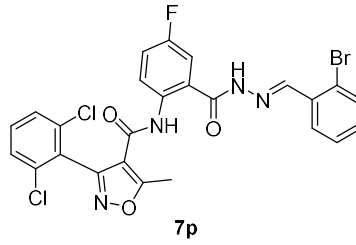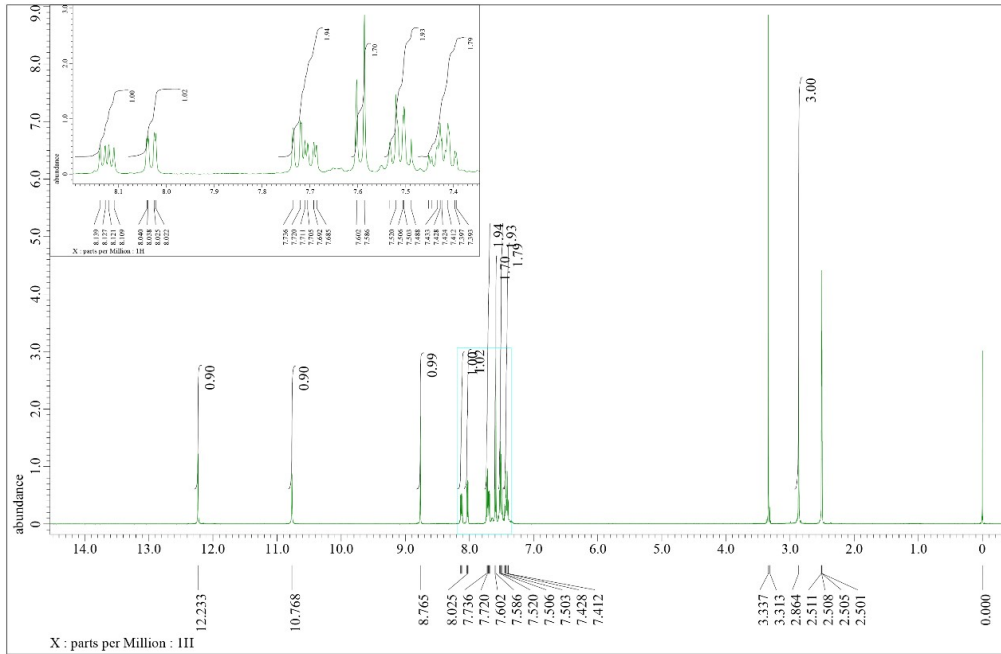

**<sup>1</sup>H NMR of Compound 7p**

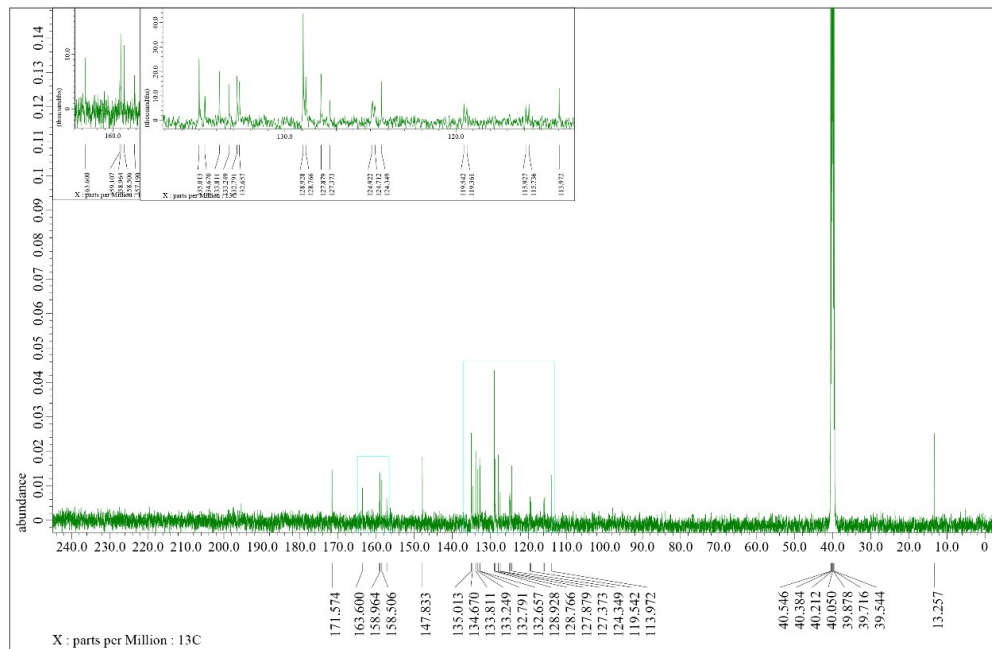

**<sup>13</sup>C NMR of Compound 7p**

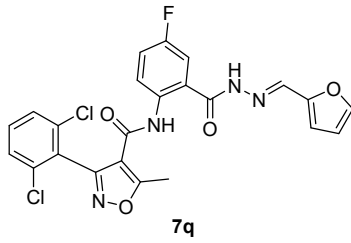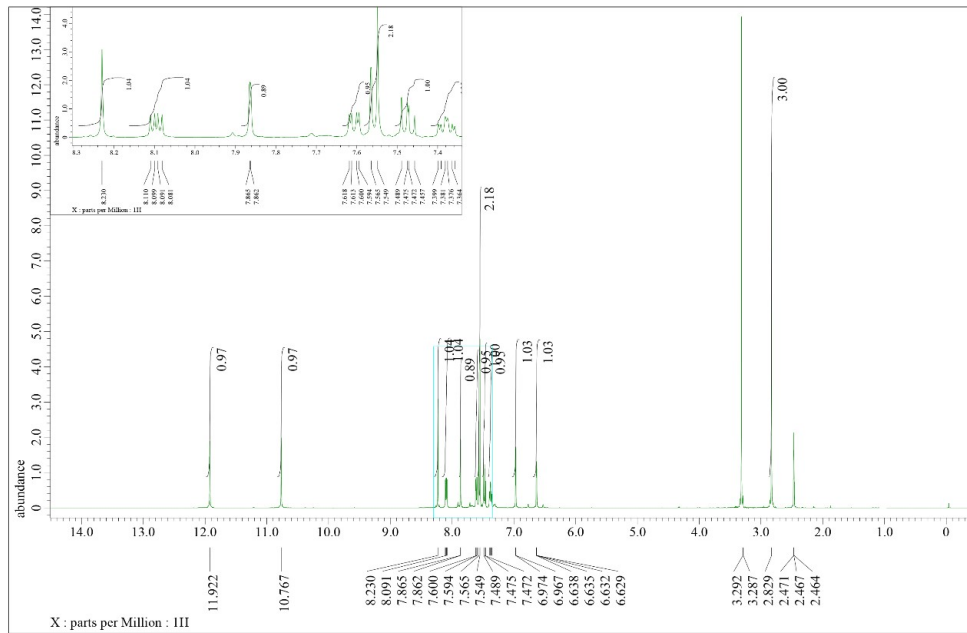

**<sup>1</sup>H NMR of Compound 7q**

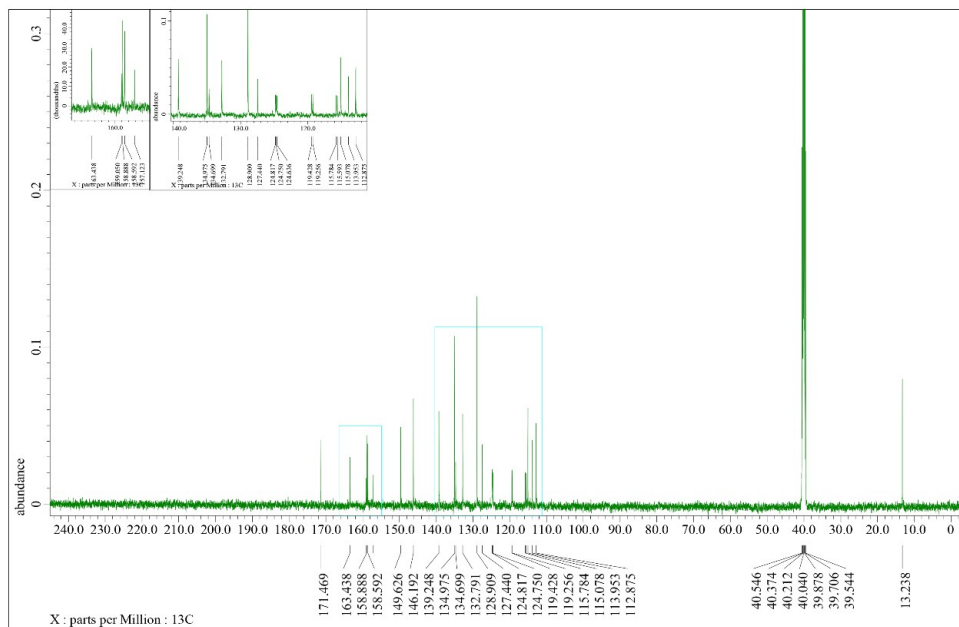

**<sup>13</sup>C NMR of Compound 7q**

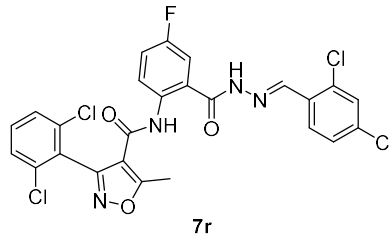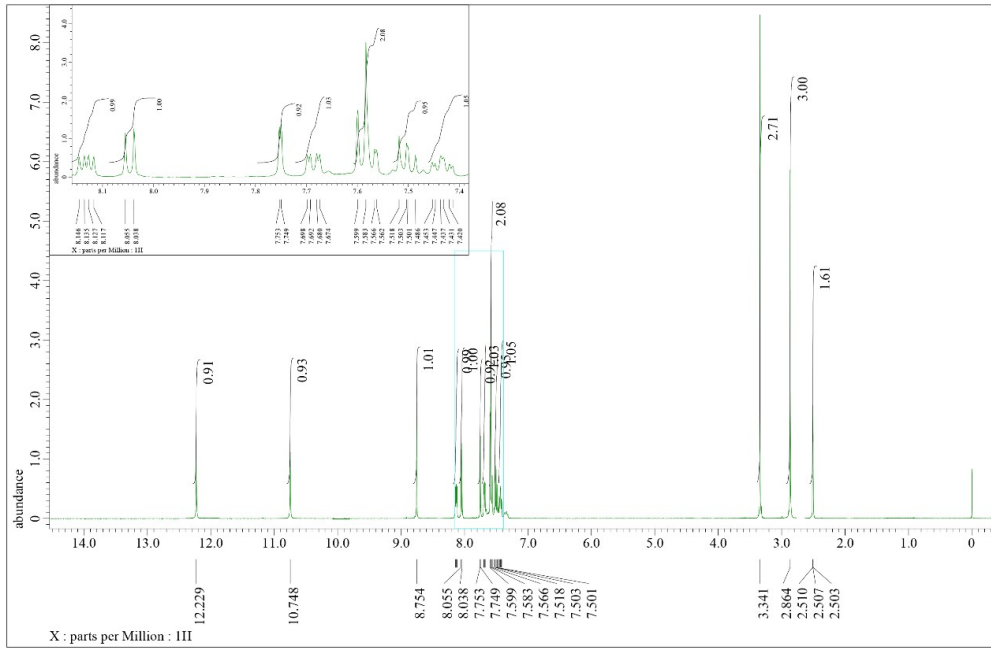

<sup>1</sup>H NMR of Compound 7r

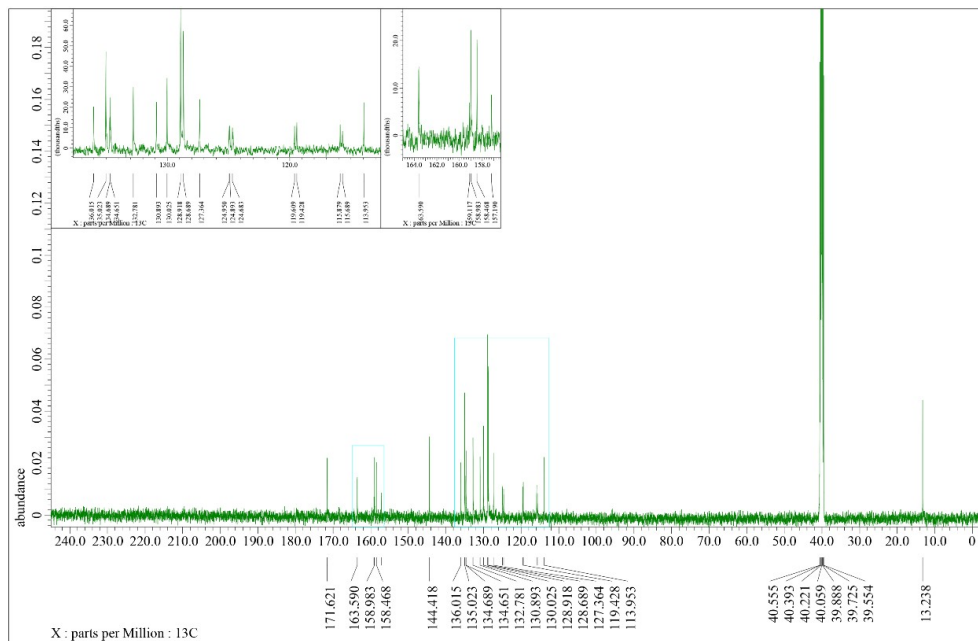

<sup>13</sup>C NMR of Compound 7r

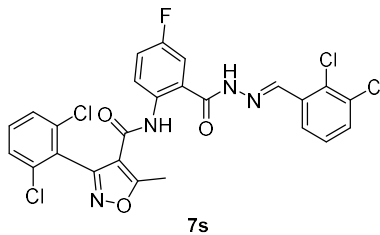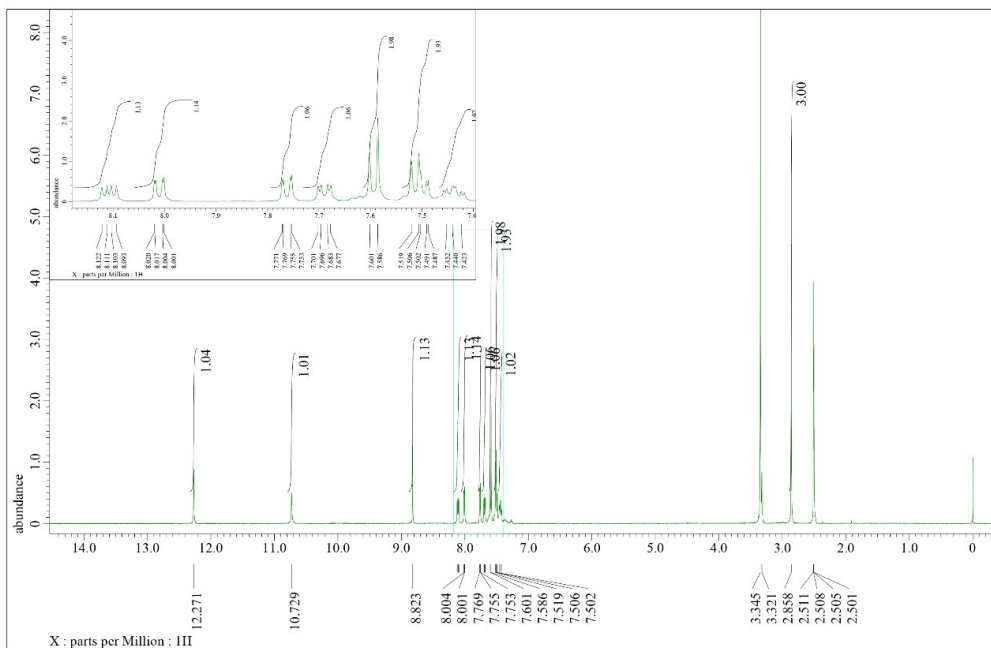

<sup>1</sup>H NMR of Compound 7s

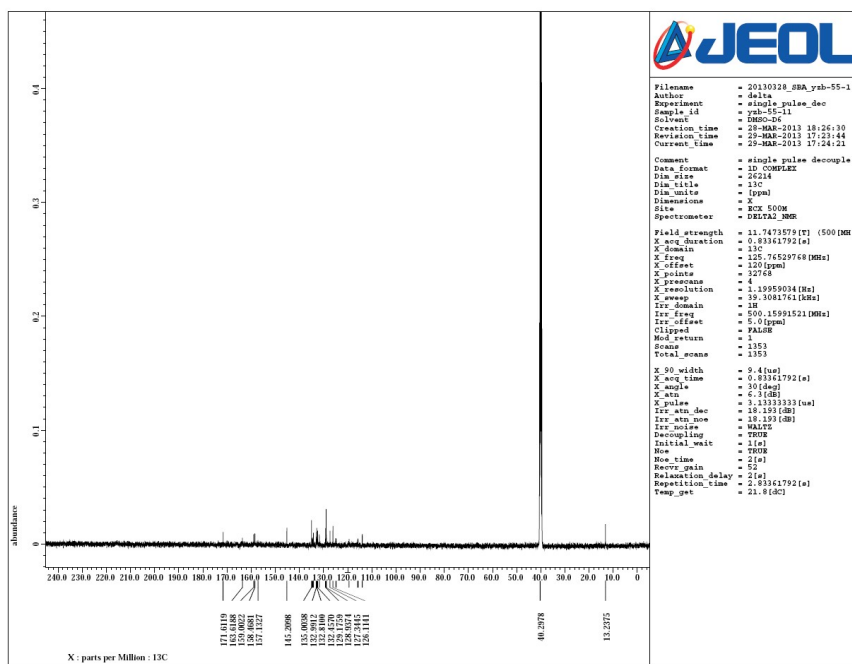

<sup>13</sup>C NMR of Compound 7s



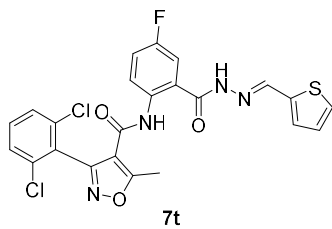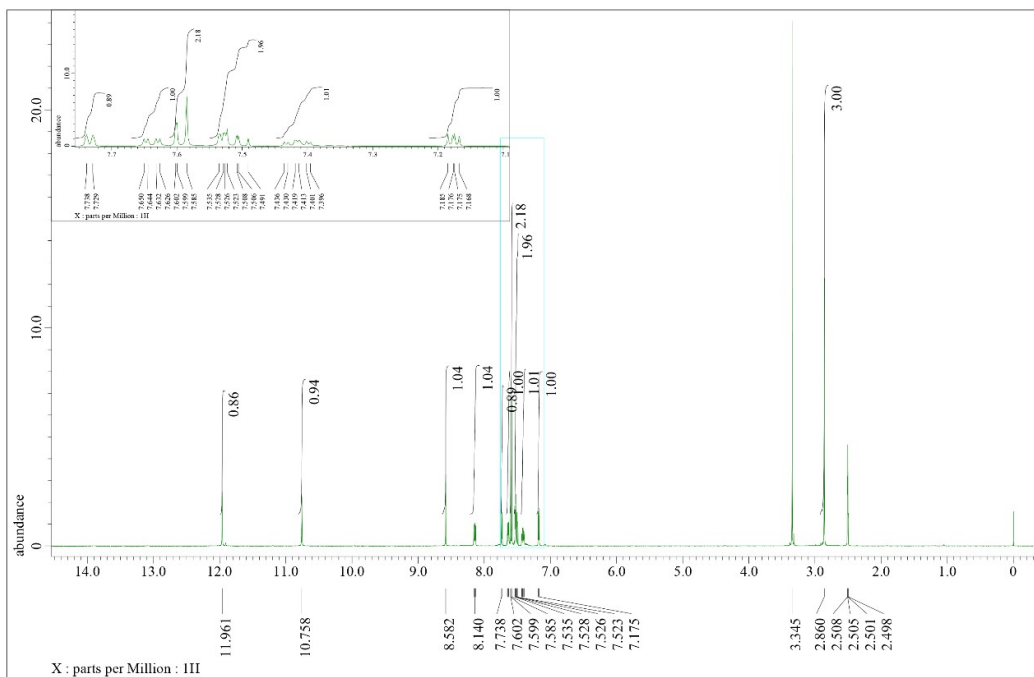

**<sup>1</sup>H NMR of Compound 7t**

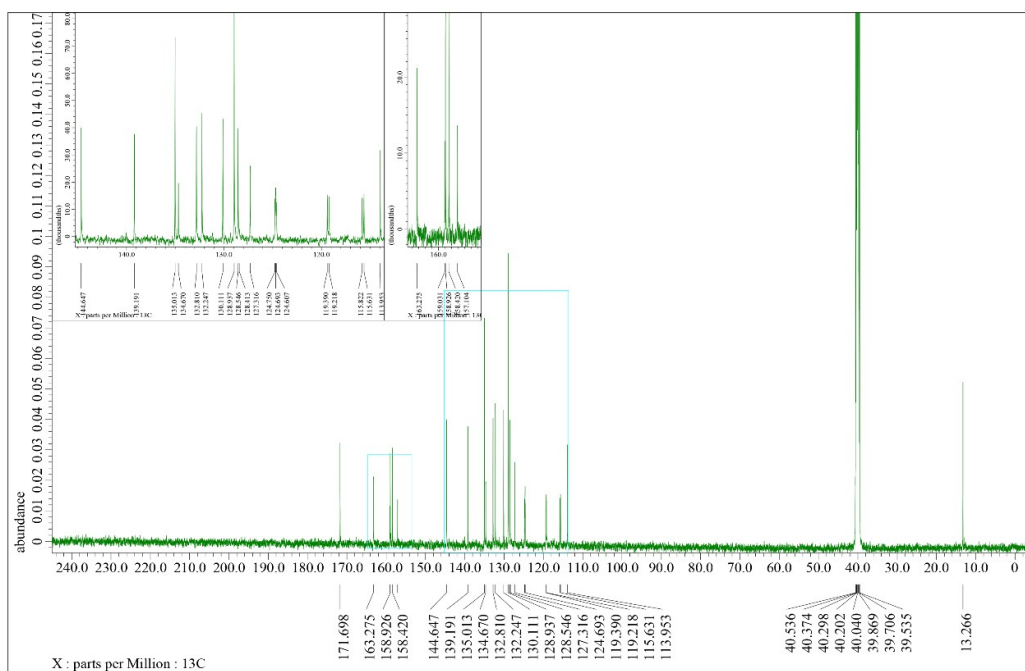

**<sup>13</sup>C NMR of Compound 7t**

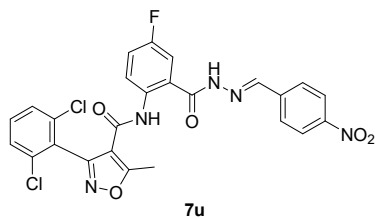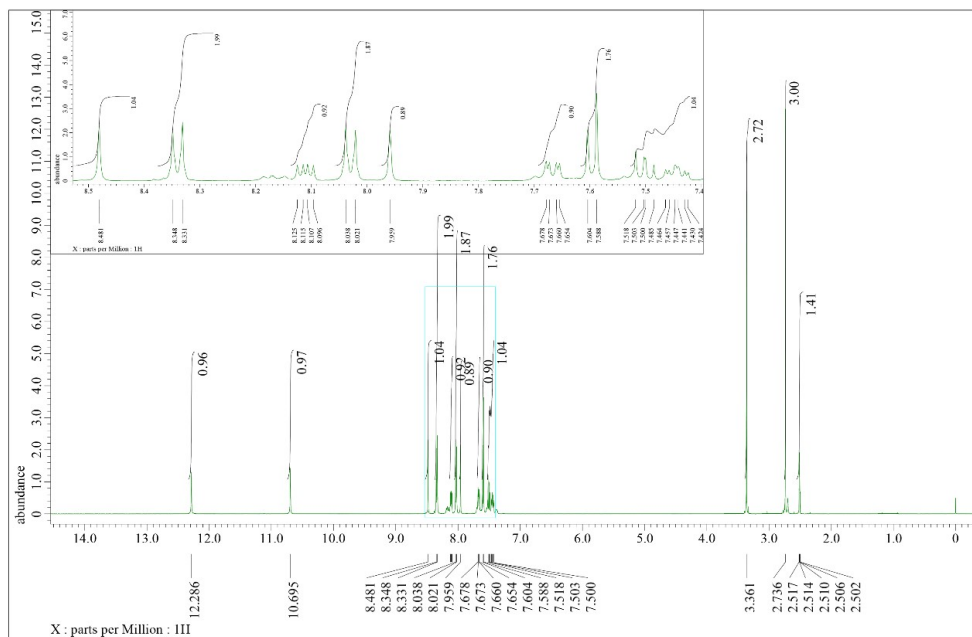

**<sup>1</sup>H NMR of Compound 7u**

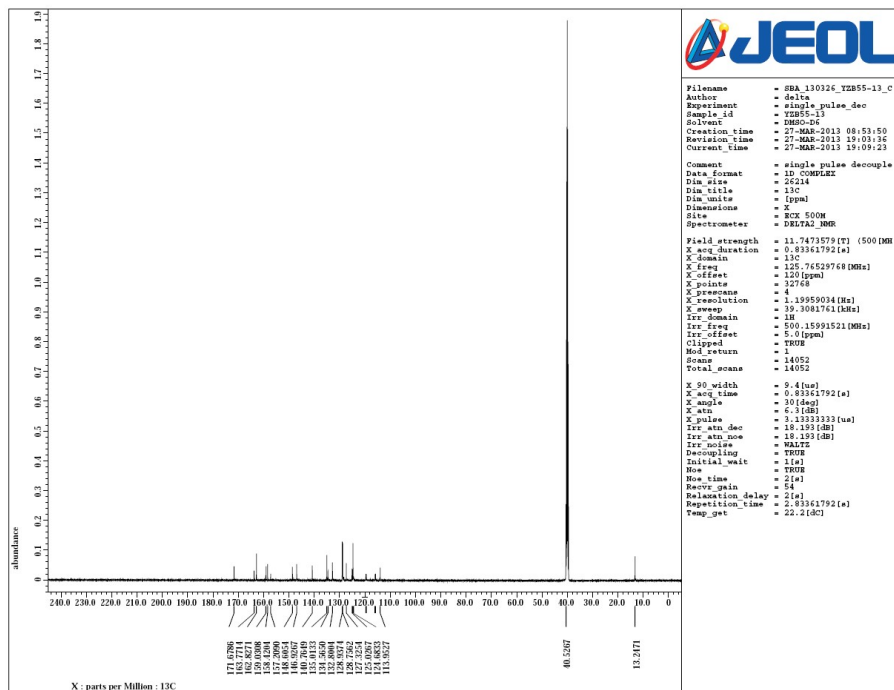

**<sup>13</sup>C NMR of Compound 7u**

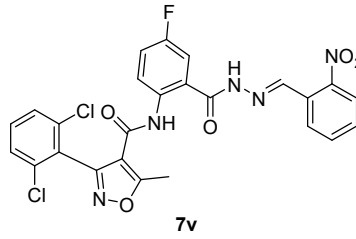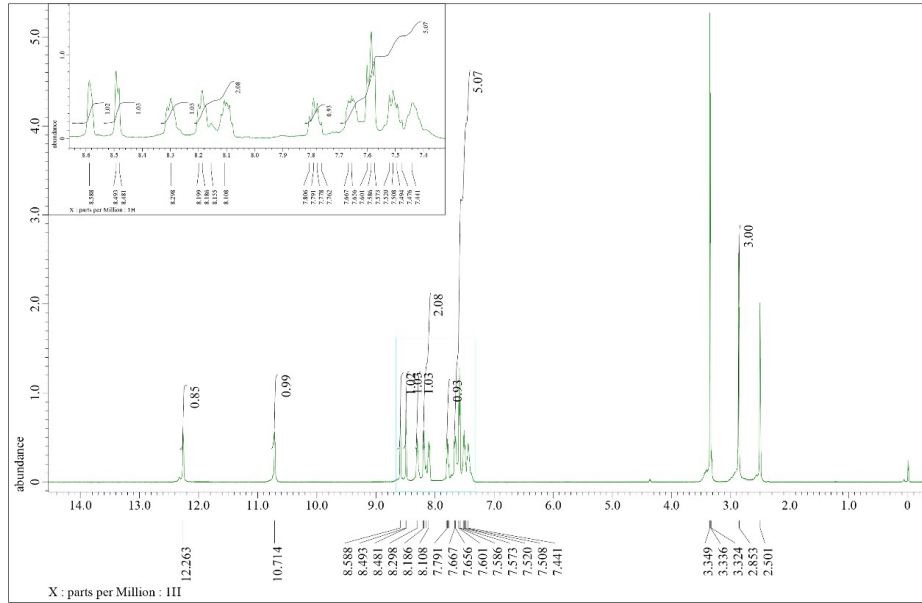

<sup>1</sup>H NMR of Compound 7v

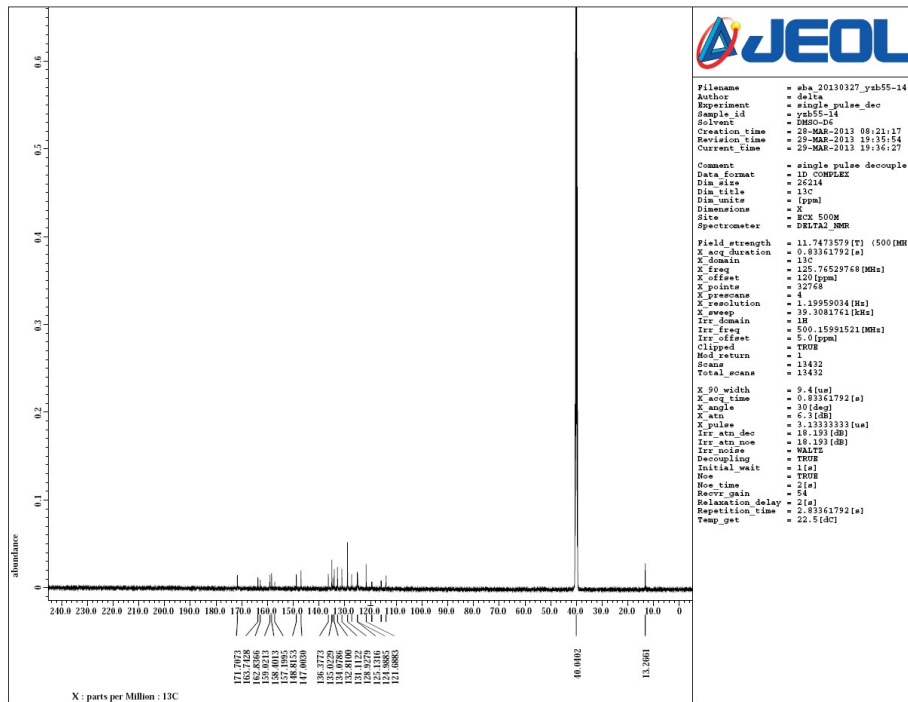

**JEOL**

```

Filename      = sba_20130327_yhb55-14
Author       =
Experiment   = single_pulse_dec
Sample_id    = yhb55-14
Solvent      = DMSO-d6
Creation_time = 28-MAR-2013 08:21:17
Revision_time = 28-MAR-2013 19:35:54
Current_time  = 29-MAR-2013 19:36:27

Comment      = single pulse decouple
Data format  = 1D COMPLEX
Dia_size     = 25214
Dia_title    = 13C
Dia_units    = (ppm)
Dimensions   = X
Site         = BXC 500M
Spectrometer = DELTA2_300M

Field_strength = 11.747379 (T) (500 MHz)
X_acq_duration = 0.83361792 (s)
X_domain      = 13C
X_freq        = 125.76529748 (MHz)
X_offset      = 130 (ppm)
X_points      = 32768
X_prescans    = 4
X_resolution  = 1.19959034 (Hz)
X_sweep       = 35.9081761 (Hz/s)
Int_domain    = 1H
Int_freq      = 500.1591521 (MHz)
Int_offset    = 5.0 (ppm)
Clipped      = 1608
Mod_return    = 1
Snooze       = 13432
Total_scans   = 13432

X_90_width    = 9.4 (use)
X_acq_time    = 0.83361792 (s)
X_angle       = 30 (deg)
X_atn         = 6.3 (dB)
X_pulse       = 3.1333333 (use)
Int_atn_dec   = 18.193 (dB)
Int_atn_noise = 18.193 (dB)
Decoupling    = WALTZ
Initial_wait  = 1 (s)
Noise         = 1908
New_time      = 2 (s)
Recvr_gain    = 5 (s)
Relaxation_delay = 2 (s)
Repetition_time = 2.83361792 (s)
Temp_get      = 22.5 (deg)
  
```

<sup>13</sup>C NMR of Compound 7v
